# 1 Single-cell ATAC-seq clustering and differential 2 analysis by convolution-based approach

3 **Li Lin<sup>1\*</sup>, Liye Zhang<sup>1\*</sup>**

4 <sup>1</sup>School of Life Science and Technology, ShanghaiTech University, Shanghai, China.

5 \*Correspondence should be addressed to L.L. ([linli@shanghaitech.edu.cn](mailto:linli@shanghaitech.edu.cn)) or L.Z.

6 ([zhangly@shanghaitech.edu.cn](mailto:zhangly@shanghaitech.edu.cn)).

7

## 8 **Abstract**

9 Single-cell ATAC-seq is a powerful tool to interrogate the epigenetic heterogeneity of cells. Here,  
10 we present a novel method to calculate the pairwise similarities between single cells by directly  
11 comparing their Tn5 insertion profiles instead of the binary accessibility matrix using a  
12 convolution-based approach. We demonstrate that our method retains the biological  
13 heterogeneity of single cells and removes undesirable batch effects, which leads to more  
14 accurate results on downstream analyses such as dimension reduction and clustering. Based on  
15 the similarity matrix learned from epiConv, we develop an algorithm to infer differentially  
16 accessible peaks directly from heterogeneous cell population to overcome the limitations of  
17 conventional differential analysis through two-group comparisons.

18

## 19 Introduction

20 The expression of genes is regulated by a series of transcription factors (TFs) that bind to the  
21 regulatory elements of the genome. As the accessible chromatin covers more than 90% TF  
22 binding regions, many techniques, such as Assay for Transposase-Accessible Chromatin using  
23 sequencing (ATAC-seq), have been developed to detect the accessible states of chromatin<sup>1, 2</sup>.  
24 Recent technical advancements in ATAC-seq have made it possible to profile the chromatin states  
25 of single cells at a high-throughput manner<sup>3-5</sup>. However, both data processing and interpretation  
26 of single-cell ATAC-seq (scATAC-seq) data is more challenging than single-cell RNA-seq (scRNA-seq)  
27 data owing to low DNA copy number and complexity of chromatin states<sup>1</sup>.

28 Up to now, most methods cluster single cells based on a peak by cell matrix (e.g. Buenrostro  
29 et al. 2015<sup>6</sup>). Unlike well-annotated RNA transcripts in the genome, the exact locus of regulatory  
30 elements is largely uncharacterized and must be learned from the data itself. However, learning  
31 cell type specific regulatory elements from cell mixtures is problematic<sup>7</sup>. Moreover, given that  
32 there are no golden rules to define functional elements across the genome, the strategies to  
33 perform such task varied considerably in different studies<sup>6, 8</sup>, and its effect on downstream  
34 analyses is largely unknown.

35 Detecting differentially expressed genes (or differentially accessible peaks for ATAC-seq, we  
36 call them DE peaks below) is another important task in single cell analysis. In a conventional  
37 pipeline, cells are first grouped into several clusters and subsequent differential analysis is  
38 performed by comparison between clusters. Thus, the resolution settings (e.g. number of clusters)  
39 may have strong effects on the identification of genes or locus accounting for the heterogeneity  
40 of cell population. Recently one method incorporated pseudotime as one predictor into the

41 regression model to infer DE peaks, instead of performing two-group comparisons<sup>9</sup>. But it  
42 required cells to be properly embedded into one dimensional space (e.g. pseudotime through  
43 differentiation process), which greatly limits its application in complex cell population. Moreover,  
44 cells still need to be clustered into small groups (50~100 cells). Such processing step overcomes  
45 the sparsity of scATAC-seq data but reduces the sample size. In scRNA-seq, an alternative  
46 approach is to find highly variable genes instead of differentially expressed genes, which does not  
47 require the clustering of cell population to be defined. But this strategy cannot be applied to  
48 scATAC-seq as the chromatin state is always binarized. Despite that, several state-of-the-art tools  
49 designed for scATAC-seq merge individual peaks into meta features (regulomes, topics, principal  
50 components, k-mers, etc.) to overcome the sparsity of data<sup>3, 10, 11</sup>. Subsequent differential  
51 analysis is performed on meta features instead of individual peaks. Such strategy may help reveal  
52 the epigenetic programs that governs the cell identities but lacks sufficient resolution for the  
53 dynamic change of individual peaks.

54 Here, we introduce a novel tool, named epiConv, for scATAC-seq analysis. EpiConv addresses  
55 two important questions in scATAC-seq analysis, cell clustering and differential analysis. Unlike  
56 most of existing methods, epiConv learns the similarities (or distances) between single cells from  
57 their raw Tn5 insertion profiles by a convolution-based approach, instead of a binary accessibility  
58 matrix. We demonstrate that epiConv retains biological heterogeneity of single cells and removes  
59 unwanted variations derived from multiple batches or sample preparing protocols. Utilizing the  
60 similarities learned by epiConv, we also develop an algorithm to infer DE peaks among single cells  
61 that can be directly applied to cell mixtures without resolving the intra population structure.

62

## 63 Results

### 64 Infer the similarity from Tn5 insertion profiles

65 First, we give an overview of the algorithm that calculates the similarity between cells from  
66 their Tn5 insertion profiles (**Fig. 1**). Given two cells, A with  $m$  insertions and B with  $n$  insertions in  
67 one genomic region, we collapse the insertions into a continuous distribution across the genome  
68 by Gaussian smoothing as follows:

$$69 \quad f_{Ai}(x) = \frac{1}{\sqrt{2\pi}\sigma} \exp\left(-\frac{(x-\mu_{Ai})^2}{2\sigma^2}\right), \quad f_A(x) = \sum_i^m f_{Ai}(x)$$
$$70 \quad f_{Bj}(x) = \frac{1}{\sqrt{2\pi}\sigma} \exp\left(-\frac{(x-\mu_{Bj})^2}{2\sigma^2}\right), \quad f_B(x) = \sum_j^n f_{Bj}(x)$$

71 Where  $\mu_{Ai}$  is the locus of insertion  $i$  in cell A,  $\mu_{Bj}$  is the locus of insertion  $j$  in cell B,  $f_A(x)$   
72 and  $f_B(x)$  give the overall chromatin states of cell A and cell B in the given region. The similarity  
73 between A and B over the given region ( $S_{AB}$ ) is calculated by the convolution of  $f_A(x)$  and  $f_B(x)$   
74 and can be solved analytically as follows:

$$s_{AB} = \int f_A(x)f_B(x)dx = C \cdot \sum_{i,j} \exp\left(-\frac{(\mu_{Ai} - \mu_{Bj})^2}{4\sigma^2}\right)$$

75 Where C is an  $\sigma$  dependent constant. In this study, parameter  $\sigma$  is set to 100 bp. To save running  
76 time, long distance ( $> 4\sigma$ ) is treated as infinity. Through weighted aggregation of the similarities  
77 from all informative regions across the genome and proper normalization with respect to  
78 sequencing depth, we can obtain the normalized similarity score between any two cells.  
79 Subsequent analyses such as dimension reduction or clustering can be performed on the  
80 similarity matrix. We also develop a simplified version of epiConv (epiConv-simp), which can be  
81 applied to binary accessibility matrix like existing methods. The simplified version does not  
82 perform as well as the full version but always generates similar results and runs much faster. In  
83 the benchmarking below, we show the results from both full and simplified versions. Other

84 details of epiConv are provided in Methods section.

85

## 86 **EpiConv outperforms other methods in cell lines data**

87 We evaluated the performance of epiConv on several datasets and compared it with  
88 cisTopic<sup>11</sup>, Latent Semantic Indexing (LSI)<sup>3</sup> and SnapATAC, which show better performance than  
89 other methods in one recently published benchmarking study<sup>7</sup>. We first applied epiConv to the  
90 data from Buenrostro et al. 2015<sup>6</sup>. Specifically, we mixed the data of four cell lines from  
91 hematopoietic lineages (K562, GM12878, HL-60 and TF-1) together and tested whether epiConv  
92 could cluster single cells correctly based on their biological identities. Given the apparent  
93 difference among cell lines, each method performed well in clustering single cells from the same  
94 cell line together (**Fig. 2**). However, we found that LSI could not clearly segregate drug-treated  
95 and untreated K562 cells. CisTopic segregated treated and untreated K562 cells into two clusters  
96 but cells treated by different drugs were still mixed together. Only epiConv-full and SnapATAC  
97 grouped K562 cells treated by different drugs into distinct clusters, while epiConv-full showed  
98 higher resolution than SnapATAC, yielding the best results. Notably, untreated K562 cells from  
99 three replicates were grouped into one cluster without obvious batch effects. Thus, the  
100 segregation of cells treated by different drugs was more likely to be attributed to their biological  
101 variations rather than batch effects. EpiConv-simp suggested one extra cluster with mixed cell  
102 types, performing worse than other methods (**Fig. 2b**). These results highlighted the superiority  
103 of directly comparing the Tn5 insertions when performing clustering on highly similar cells  
104 (SnapATAC divided the genome into equal-length bins instead of peak calling, which could also be  
105 considered as direct comparison on Tn5 insertions but with decreased resolution than

106 epiConv). However, we found that the worse performance of epiConv-simp was partially due to  
107 improper denoising method. With an alternative denoising method, epiConv-simp provided good  
108 results but still with lower resolution than the full version (top-right in **Fig. 2b**, see  
109 **Supplementary Note 1** for the details of alternative denoising method). These results suggested  
110 that the matrix still contained the variations derived from drug treatments but they could be  
111 easily overwhelmed by noise.

112

### 113 **EpiConv removes batch effects in scATAC-seq data**

114 Next, we applied epiConv to the data generated by droplet-based protocol from Satpathy et  
115 al. 2019<sup>4</sup>. The authors reported detectable batch effects from LSI method that confounded  
116 downstream analyses. Here we asked whether epiConv could perform better. We tested the  
117 performance of epiConv on two datasets, one dataset containing cells from two batches of  
118 unsorted peripheral blood mononuclear cells (PBMCs), two batches of sorted CD4+CD45RA+  
119 naïve CD4 T cells and two batches of sorted CD4+CD45RA- memory CD4 T cells (PBMC dataset),  
120 and the other dataset containing two batches of sorted CD34+ hematopoietic progenitors (CD34+  
121 dataset). Based on our preliminary analyses, epiConv still suffered from batch effects but was less  
122 sensitive compared to other methods (data not shown). So, we developed a simple method to  
123 remove detectable effects. Although there are many methods to remove batch effects for  
124 scRNA-seq data, few studies examined their performance on scATAC-seq data. So, we just  
125 compared the results of epiConv to other methods without any batch correction.

126 In PBMC dataset, the majority of cells from two replicates of memory CD4 T cells were  
127 clustered into one tightly related group by epiConv and were close to a small fraction of unsorted

128 PBMCs. Two replicates of naive CD4 T cells also showed similar results. Other unsorted PBMCs  
129 formed several groups without strong batch effects (**Fig. 3a**). On the contrary, cells were mostly  
130 clustered by batches for cisTopic, LSI and SnapATAC (**Fig. 3b, Fig. S1a,b**). These results  
131 demonstrated that epiConv successfully removed batch effects. To verify whether epiConv  
132 clustered single cells based on their biological identities, we marked single cells according to their  
133 annotations from Satpathy et al. 2019<sup>4</sup>. The results of epiConv were also largely consistent with  
134 the annotations and revealed all major lineages of PBMCs (T cells, NK cells, B cells and Monocytes)  
135 and several subpopulations of T cells (**Fig. S2a-d**). In CD34+ dataset, epiConv still performed  
136 better in removing batch effects compared to cisTopic, LSI and SnapATAC (**Fig. 3c,d, Fig. S1c,d**).  
137 Based on the annotations from Satpathy et al. 2019<sup>4</sup>, the results of epiConv were also consistent  
138 with our knowledge on hematopoietic differentiation (**Fig. S2e-h**). Moreover, only epiConv and  
139 cisTopic clearly revealed the trajectory of hematopoietic differentiation in unsupervised manner,  
140 while the results of epiConv were with higher resolution and less noise than cisTopic.

141 To demonstrate that the power of epiConv was not restricted to specific cell lineages or  
142 sample-preparing protocols, we combined scATAC-seq data of adult mouse brain from three  
143 experimental protocols, mouse cortex from 10x Genomics, whole mouse brain from droplet  
144 single-cell assay for transposase-accessible chromatin using sequencing (dscATAC-seq)<sup>5</sup> and sci-  
145 protocols for chromatin accessibility (sci-ATAC-seq)<sup>8</sup>. The dataset contained single cells from 5  
146 batches, one from 10x Genomics, two from dscATAC-seq and two from sci-ATAC-seq. Consistent  
147 with previous results, epiConv performed better than cisTopic, LSI and SnapATAC in removing  
148 batch effects (**Fig. 3e,f, Fig. S1e,f**) and agreed with the annotations from Cusanovich et al. 2018<sup>8</sup>  
149 and Lareau et al. 2019<sup>5</sup> by clustering cells with the same identity together (**Fig. S2i,m**). Although

150 cisTopic suffered from batch effects, it largely agreed with the annotations from original articles  
151 within each batch (**Fig. S2j,n**). However, LSI and snapATAC performed worse when comparing  
152 them with the annotations from original articles (**Fig. S2k,l,o,p**). Although we lacked direct  
153 evidence to evaluate which method performed best in clustering cells according to their cell  
154 identities, the results of epiConv and cisTopic largely agreed with each other and could be  
155 supported by the annotations from original article. Besides that, only epiConv was capable of  
156 clustering cells in a batch-independent manner. Finally, we compared the results between full and  
157 simplified versions of epiConv. Simplified version was highly consistent with full version on the  
158 three datasets described above and also performed better than other methods (**Fig. S3**).

159

## 160 **EpiConv is scalable with large datasets**

161 As the full version of epiConv do pairwise comparisons between single cells, the step of  
162 insertions counting is slower than other methods but can be split into small jobs and run in  
163 parallel. Based on our tests, it requires 75 CPU hours for 50 million fragments from 5,000 cells  
164 (after removing low quality cells and fragments outside informative regions) and 2,400 CPU hours  
165 for 270 million fragments from 20,000 cells. The simplified version runs much faster and can be  
166 applied to large datasets. Based on our tests, the simplified version requires 17 hours and 520 GB  
167 RAM for the Mouse Cell Atlas dataset<sup>8</sup> (81,173 cells and 436,206 peaks) with single thread, faster  
168 than cisTopic (48 hours) but slower than LSI (1 hour). SnapATAC failed to run on the full dataset of  
169 Mouse Cell Atlas dataset in the step of calculating Jaccard distance due to the memory limitation  
170 for single object in R (This error may depend on the system as Chen et al.<sup>7</sup> reported that  
171 SnapATAC could run on the full dataset. Actually, we also encountered the same error for epiConv



172 but we modified our scripts to avoid it). The results of Mouse Cell Atlas dataset by epiConv-simp  
173 also largely agreed with the annotations from Cusanovich et al. 2018<sup>8</sup> (**Fig. S4**).

174 Notably, a large proportion of cells were marked as unknown in the Mouse Cell Atlas dataset  
175 (**Fig. 4a-d**). In the results of cisTopic , LSI and SnapATAC (we randomly sampled 25% cells in  
176 Mouse Cell Atlas dataset for SnapATAC), these cells formed a large cluster of their own, showed  
177 close relationships with several clusters with known identities but did not overlap with them (**Fig.**  
178 **4a-c**). However, unknown cells did not form a single cluster but were mixed with other known cell  
179 types in the results of epiConv-simp (mainly associated with 6 clusters with more than 10% cells  
180 marked as unknown, **Fig. 4d**). This might suggest a large improvement of epiConv over existing  
181 methods. In order to validate our findings, we aggregated the cells with known and unknown cell  
182 identities respectively for each cluster. Then we calculated the spearman correlation between the  
183 12 aggregated samples over a set of highly accessible peaks (accessible in at least 1% cells from  
184 these 6 clusters). We found that all unknown samples showed highest correlations with  
185 corresponding known samples within the same clusters (**Fig. 4e**). Individual unknown samples  
186 showed low correlations with each other, suggesting that epiConv successfully “demultiplexed”  
187 unknown cells by their biological identities. By these results, we confirmed that epiConv showed  
188 significant improvements over existing methods on the Mouse Cell Atlas dataset. Combined with  
189 other results of epiConv-simp mentioned above, we concluded that in most cases epiConv-simp  
190 also proved to be a reliable tool for the investigation of large datasets.

191

## 192 **EpiConv detects differentially accessible peaks in cell mixtures**

193 In the section below, we aim to develop an algorithm to infer DE peaks directly from cell

194 mixtures. Our algorithm compares the number of accessible cells among each cell's neighbors  
195 with the proportion of accessible cells in cell mixture for each peak and turns the binary  
196 chromatin states into normalized z-scores, which show the enrichment of accessible cells among  
197 neighbors (we call it z-scores below). If the number of cells showing high z-scores for one peak  
198 exceeds the threshold, we then consider the peak to be differentially accessible. Details of our  
199 algorithm can be found in Methods.

200 In order to test whether the algorithm could detect DE peaks in cell mixture, we first applied  
201 our method to one dataset of myoblast differentiation<sup>9</sup>. We found that although epiConv could  
202 reconstruct the differentiation process of myoblasts, where cells were roughly ordered by  
203 harvesting times (**Fig. 5a,b**), it was difficult to cluster cells due to the continuous differentiation  
204 process. Using our algorithm, we detected 37,107 peaks to be differentially accessible during the  
205 differentiation process. To show the dynamics of DE peaks, we plotted heatmap of z-scores,  
206 where cells and DE peaks were embedded into one-dimensional (1D) space based on the  
207 similarity matrix and the spearman correlation of z-scores between peaks (**Fig. 5b**). The results  
208 showed approximately half peaks to be more accessible in the early stage of differentiation and  
209 others to be more accessible in the later stage. The dynamic changes of z-scores along  
210 differentiation was consistent with merged scATAC-seq profiles by harvesting times,  
211 demonstrating the reliability of our algorithm (**Fig. 5c**).

212 Next, we want to test the sensitivity of our algorithm. We applied our algorithm to the  
213 HSC-MPP-LMPP cluster in the CD34+ dataset. We chose the HSC-MPP-LMPP cluster because up  
214 to now, few methods could distinguish MPPs from HSCs in scATAC-seq data duo to the high  
215 similarity between them (see the benchmarking study of Chen et al.<sup>7</sup>). Given epiConv already

216 removed most of batch effects, we could include cells from both replicates of CD34+ dataset to  
217 increase the statistical power. Through our algorithm, we detected 27,612 DE peaks within the  
218 HSC-MPP-LMPP cluster. The dynamic changes of z-scores were highly consistent with the bulk  
219 ATAC-seq profiles of FACS-sorted HSCs, MPPs and LMPPs<sup>12</sup> (**Fig. 5d,e**). All DE peaks were properly  
220 ordered through the 1D embedding and agreed with their accessibility dynamics in both  
221 single-cell and bulk samples, suggesting that the co-accessible pattern between peaks could be  
222 revealed by z-scores. (**Fig. 5d,e**). Moreover, our results also showed gradual gain or loss of  
223 accessibility in a wide range of peaks in HSCs, revealing the continuous cell state transition within  
224 HSCs. Although we lacked direct evidence to evaluate whether epiConv clustered HSCs and MPPs  
225 into two groups, we could still extract HSC and MPP unique signatures through DE analysis. As  
226 scaled heatmap could not reveal the fold change of peaks, we also examined the log2 Fold  
227 Change between MPP, HSC and LMPP bulk samples for all detected DE peaks (**Fig. 5f**). Most peaks  
228 showed strong difference between MPP/LMPP or HSC/LMPP bulk samples, while MPP or HSC  
229 unique peaks just showed weak difference between MPP/HSC bulk samples. As is shown by many  
230 single-cell studies, FACS-sorted cells may still be the mixtures of similar cell types. We thought  
231 that this could partially explain the weak difference between MPP/HSC bulk samples.  
232 Unexpectedly, we also found that LMPPs could be further divided into three groups based on  
233 their unique signatures and bulk LMPPs seemed to be the mixture of these three groups. By  
234 comparing the z-scores of single cells with bulk samples, we found that they might represent  
235 different stages of LMPPs during differentiation (early undifferentiated stage, later stage to GMP  
236 and later stage to CLP, see heatmap in the right in **Fig. 5e**). These results demonstrated that  
237 inferring DE peaks directly from cell mixtures helped reveal the intra-population structure and

238 intermediate cell states in a signature-driven manner instead of statistical ways.

239 We also applied our algorithm to all cells in CD34+ dataset to test the scalability of our  
240 algorithm. Similar with previous results on HSC-MPP-LMPP cluster, we also found a series of  
241 peaks that gradually gained or lost accessibility through differentiation (e.g. in MDPs, **Fig. S5a**).  
242 The z-scores did not fully capture the chromatin states of bulk samples for a few peaks (**Fig. S5b**).  
243 We found that it could be explained by the difference between single-cell and bulk samples (data  
244 not shown), probably because there might be some batch effects between them. In fact, it was  
245 not difficult to infer DE peaks from distinct clusters. But we demonstrated that our algorithm  
246 could also perform such task like conventional methods.

247 We found that sometimes the z-scores did not agree with the binary accessibility profiles of  
248 single cells. It was because z-scores were normalized by the library size of single cells. However,  
249 we thought that the library size of single cells in droplet-based protocols could reveal the  
250 difference of global chromatin states between different cell types. By comparing the chromatin  
251 states of neighbors with the background, our algorithm already removed the variation of library  
252 size for individual cells. So, we designed another normalization strategy, where the scaling factors  
253 of all cells were set to 1. We tried this normalization strategy in cells from replicate 1, where all  
254 cells were processed in parallel during experiment and their library size could reflect the global  
255 chromatin states. The z-scores were consistent with binary accessibility profiles under this  
256 normalization strategy (**Fig. S5c,d**) but did not agree with corresponding bulk samples (**Fig. S5e**).

257

## 258 **Discussions**

259 In this study, we developed a novel method to directly compare the Tn5 insertions between

260 single cells and compared it with three existing methods, cisTopic, LSI and SnapATAC. Results  
261 demonstrated that our method had several advantages over existing methods. The most  
262 significant difference between our algorithm and others is that we calculated the distance  
263 between single cells using a convolution-based approach instead of commonly used  
264 Euclidean-distance. Although the Jaccard similarity used by SnapATAC is similar to epiConv  
265 (Assuming two binary vector A and B, Jaccard similarity is calculated by  $\frac{|A \cap B|}{|A \cup B|}$ , while epiConv uses  
266  $\frac{|A \cap B|}{|A| + |B|}$ . Moreover, epiConv assigns weights to different loci), the distance is calculated by  
267 Euclidean-distance on principal components. Interestingly, we also found a way to make epiConv  
268 mimic the behavior of other methods, making it easy to compare the difference between two  
269 forms of distance. Given the similarity matrix  $S$  before denoising step, we used Eigen value  
270 decomposition to obtain a series of latent features from  $S$ . Given  $Q^T S Q = \Lambda$ , where  $Q$  is the matrix  
271 containing Eigen vectors of  $S$  and  $\Lambda$  is the diagonal matrix containing Eigen values of  $S$ , the  
272 columns of  $Q \Lambda^{\frac{1}{2}}$  can be considered as latent features. Here we used top 50 latent features. By  
273 calculating the Euclidean-distance on these latent features, the behavior of epiConv was highly  
274 similar with existing methods (we showed the results of PBMC dataset and Mouse Cell Atlas  
275 dataset in **Fig. S6**). In PBMC dataset, epiConv became sensitive to batch effects and the batch  
276 effects could not be removed by our algorithm (compare **Fig. S6a** with **Fig. 3a,b** and **Fig. S1a,b**).  
277 However, within each batch, major cell types could also be distinguished like other methods (**Fig.**  
278 **S6b**). In Mouse Cell Atlas dataset, epiConv clustered “unknown” cells into single cluster like other  
279 methods (compare **Fig. S6c** with **Fig. 4a-d**). These results clearly demonstrated that different  
280 denoising process could have significant effects on our understanding of the cell heterogeneity  
281 even when the raw data is identical. We hypothesized that methods trying to capture latent

282 features may suffer from common biases. By using convolution-based approach to define the  
283 similarities between cells, epiConv provides a new angle of view in the analysis of sparse  
284 epigenetic data. Moreover, epiConv also provides DE analysis in single-cell resolution and in  
285 unbiased manner, while no existing methods could perform such task. Thus, we believe that  
286 epiConv will have wide applications and improve our understanding on the epigenetic dynamics  
287 of single cells.

288

## 289 **Methods**

290 **Informative region calling for epiConv.** EpiConv takes processed fragments as input file. To call  
291 informative regions for epiConv, we first extended Tn5 insertions from both directions using the  
292 pileup command in MACS2<sup>13</sup> (-B --extsize 100). Then, we sorted all sites of the genome by their  
293 density in decreasing order and selected regions with cumulative density less than 70% of total  
294 insertions. These regions were extended from both directions by 100 bp and merged together if  
295 having any overlap. Tn5 insertions overlapping with these informative regions (~70% of total  
296 reads) were used for downstream analysis. We used such strategy instead of MACS2 because the  
297 proportion of reads used in downstream analyses could be easily specified through the threshold  
298 of cumulative density. Moreover, this strategy can always obtain some peaks, while MACS2 may  
299 fail when the number of cells is low (e.g. < 200, reported by Satpathy et al. 2019<sup>4</sup>). The threshold  
300 of cumulative density is determined by the distribution of insertion length. Based on our  
301 preliminary analysis, fragments spanning one or more nucleosomes are noisier than fragments  
302 from nucleosome-free regions. Thus, the threshold should be close to the proportion of  
303 fragments from nucleosome-free regions. For the myoblast and mouse brain datasets, we set the

304 threshold to 50% as they had higher proportion of fragments spanning one or more nucleosomes  
305 (data not shown). The major purpose of informative region calling is to calculate the weights for  
306 different genomic regions (see below). Additionally, it could remove some background noise.  
307 Although it is possible to compare the Tn5 insertions of the whole genome, which might help  
308 detect rare cell types, we find that it just increases running time but does not improve the  
309 results.  
310 **epiConv algorithm.** In the results section, we described the algorithm to calculate the similarity  
311 between two cells over one region. Here assume that we have N cells and K regions, with the  
312 similarities between any two cells  $i$  and  $j$  over region  $k$  ( $s_{ijk}$ ) being known. First, we weight each  
313 region as follows:

$$freq_k = \sqrt{\frac{2}{N(N-1)} \sum_{ij} s_{ijk}}$$
$$w_k = \log_{10}(1 + freq_k^{-1})$$

314 The form of weight is similar to that used in LSI but the frequency is replaced by a  
315 pseudo-frequency estimated from our convolution-based approach. We use such form of weight  
316 to increase the contribution of low-density regions to the similarity score. The similarity between  
317 cell  $i$  and  $j$  is calculated using a bootstrap approach. Assuming we perform L replicates (L = 30 in  
318 this study) and in each replicate we randomly sample some regions (12.5% of total informative  
319 regions in this study). The similarity of  $s_{ij}$  is calculated as follows:

$$s_{ij} = \frac{\sum_l \log_{10}(\sum_{k \in rep_l} s_{ijk} \cdot w_k^2)}{L} - \log_{10}(lib_i \cdot lib_j)$$

320 where  $lib_i$  and  $lib_j$  is the library size of cell  $i$  and  $j$ . We normalize the aggregated similarity by  
321  $lib_i \cdot lib_j$  because  $\sum_{k \in rep_l} s_{ijk} \cdot w_k^2$  can be considered as the sum of  $lib_i \cdot lib_j$  random  
322 variables with identical distribution given the analytical form of similarity described above.

323 Averaging the similarities from replicates helps reduce the noise compared to simple aggregation  
324 of similarities from all regions. But for deep sequencing data, we find that simple aggregation  
325 also generates similar results (data not shown).

326 In the simplified version, matrix is first binarized and TF-IDF transformed like LSI<sup>3</sup> (In  
327 epiConv-simp, normalization with respect to sequencing depth and peak weighting are identical  
328 as LSI). Given TF-IDF matrix  $M$  and  $L$  bootstrap matrices  $M_{rep_l}$  by randomly sampling peaks from  
329  $M$ , the similarity matrix  $S$  can be calculated as follows:

$$S = \frac{\sum_l \log_{10}(M_{rep_l}^T \cdot M_{rep_l})}{L}$$

330 where  $M_{rep_l}^T \cdot M_{rep_l}$  is the matrix product. Unlike LSI implemented in Cusanovich et al. 2015<sup>3</sup>  
331 and Cusanovich et al. 2018<sup>8</sup>, we do not filter any peaks. By adopting the formula above, the  
332 distance between two insertions  $\mu_{Ai} - \mu_{Bj}$  is considered as zero if they are in the same peak or  
333 infinite otherwise. Further steps are identical for full and simplified versions.

334 Next, we denoise the similarities between cells by borrowing the information from their  
335 neighbors. The denoised similarities are calculated by the number of shared nearest neighbors  
336 between two cells. The number of nearest neighbors for each cell is set to 50 in this study. If the  
337 dataset contains cells from multiple batches, we force cells to select equal number of nearest  
338 neighbors from each batch to remove batch effects. The distance matrix  $D$  is calculated by  
339  $D = -S_{denoise}$ . Although the batch removal strategy can be applied to the similarity or distance  
340 matrix generated by various methods, we find that it only works well with epiConv. As mentioned  
341 above, it is because that epiConv is less sensitive to batch effects even without any correction.

342 The denoising method above changes the unit of similarity matrix (from continuous values  
343 to integer values). Occasionally we find that it may make the results worse (see the results of



344 epiConv-simp for cell lines data in **Fig. 2b**). We also developed an alternative denoising method  
345 that keeps the unit of similarity matrix unchanged (**Supplementary Note 1**). Generally, it is noisier  
346 than the first method and cannot remove batch effects. But it may perform better when the first  
347 method fails (see top-right in **Fig. 2b**).

348 **Pre-processing of ATAC-seq data.** We took the processed fragment file or peak by cell matrix as  
349 inputs if available. For the unprocessed data from Buenrostro et al. 2015<sup>6</sup> and bulk samples from  
350 Corces et al. 2016<sup>12</sup>, we aligned raw reads to the hg19 genome using Bowtie2<sup>14</sup> (-X 2000  
351 --no-mixed --no-discordant) and removed reads with mapping quality <10 and duplicates using  
352 Picard tools. The start and end of the fragments were adjusted (+5 for forward strand and -4 for  
353 reverse strand). We called peaks using MACS2<sup>13</sup> (--nomodel --nolambda --keep-dup all --shift -200  
354 --extsize 400) and generated the count matrix by counting the number of Tn5 insertions falling in  
355 peaks.

356 For the mouse brain dataset, we randomly sampled 2,000 cells from Channel 1 and Channel  
357 2 in Lareau et al. 2019 (dscATAC-seq)<sup>5</sup>, 1,000 cells from the mouse cortex data from 10x  
358 Genomics and 2,000 cells from two replicates of whole mouse brain in Cusanovich et al. 2018  
359 (sciATAC-seq)<sup>8</sup>. The dataset contains 5,000 cells in total. Data from Cusanovich et al. 2018 were  
360 converted from mm9 to mm10 using liftOver<sup>15</sup>. Data from 10x Genomics and Cusanovich et al.  
361 2018 were re-counted against the peaks called by Lareau et al. 2019 for data integration.

362 For the myoblast dataset, few outlier cells that did not cluster together with the majority of  
363 cells were excluded in differential analysis (**Fig. 5a**).

364 **Implement of cisTopic, LSI and SnapATAC.** In cisTopic, the number of topics is set to 20, 30, 40  
365 and 50 and automatically decided by cisTopic. For the analysis of cell lines data from Buenrostro

366 et al. 2015<sup>6</sup>, in order to explore whether increased number of topics could provide higher  
367 resolution for K562 cells, we increase the number of topics from 20 to 100 with a step of 10 but  
368 the optimal number of topics is still decided by cisTopic. In LSI, we use the scripts from  
369 Cusanovich et al. 2018<sup>8</sup>, filter out peaks with frequency < 0.01 and use the top 50 components of  
370 singular value decomposition for dimension reduction. In SnapATAC, the bin size was set to 5000.  
371 We fixed the number of principal components used for dimension reduction to 30 instead of  
372 manually examining the distribution of each component to avoid ambiguity.

373 **Differential analysis algorithm.** The input data is a binarized peak by cell matrix and a similarity  
374 matrix between cells. Here we use the peak by cell matrix from previous steps. The similarity  
375 matrix is calculated by  $S_{denoise} + S/100$  (The similarity matrix is mainly determined by  $S_{denoise}$ .  
376 When two cells have equal number of common neighbors to another cell, the similarities are  
377 further determined by the original similarity matrix). For each single cell, we define  $k$  cells with  
378 highest similarities as its neighbors (including itself). Then for each peak, we test whether it is  
379 more likely to be accessible in the cell's neighbors. This problem can be resolved using  
380 hypergeometric test, with cells accessible as black balls, cells inaccessible as white balls. The  
381 sampling times ( $\hat{k}$ , the adjusted number of neighbors) is calculated by the total scaling factors of  
382 all neighbors divided by the average scaling factors of all cells. The scaling factors of cells were  
383 equal to their library sizes or set to 1 for all cells (DE analysis on replicate 1 of CD34+ dataset, see  
384 Results). The z-scores are calculated by the number of cells accessible among neighbors and  
385 z-normalized by corresponding mean and variance of the null distribution.

386 In differential analyses in this study, the number of neighbors  $k$  is set to 5% of total cells. The  
387 number of neighbors  $k$  defines the size of potential clusters, which serves similar function as the

388 number of clusters in conventional pipeline. However, the results demonstrated that our  
389 algorithm with fixed  $k$  could still detect DE peaks in clusters with a wide range of size. Here,  $k$  is  
390 set to 5% in order to make our algorithm more sensitive to DE peaks of small clusters. After  
391 obtaining the z-scores, we select peaks with z-score  $> 2$  in at least 10% cells as DE peaks. When  
392 we applied our algorithm to all CD34+ cells (whole dataset or replicate 1), we select peaks with  
393 z-score  $> 2$  in at least 30% cells as we only want to detect DE peaks between major clusters and  
394 the criterion of 10% cells suggested most peaks to be differentially accessible, which was  
395 reasonable but not desired.

396 In fact, it is not straightforward to choose a proper threshold for z-score. We find that peaks  
397 that do not satisfy the threshold described above may also show weak DE pattern. Here, we use  
398 the threshold of 10% cells with z-score  $> 2$  because selected peaks can be easily validated by bulk  
399 samples. For general purpose, users can set the threshold manually to obtain appropriate  
400 number of DE peaks.

401 **Dimension reduction.** We perform dimension reduction of single cells using the uniform  
402 manifold projection (UMAP) algorithm<sup>16</sup> by feeding umap with the distance matrix learned by  
403 epiConv, cisTopic, LSI and SnapATAC using default settings. The number of reduced components  
404 was set to 1 for heatmaps and 2 for scatterplot of cells. We also embed DE peaks into 1D space  
405 by feeding umap with the distance matrix that is calculated by one minus spearman correlation  
406 of z-scores between peaks.

407 **Bulk sample processing.** For bulk samples of hematopoietic cells from Corces et al. 2016<sup>12</sup>, we  
408 count the Tn5 insertions against the peaks called from Satpathy et al. 2019<sup>5</sup>, normalize the counts  
409 by library size and average the normalized counts across all replicates for each cell type. For the

410 myoblast dataset, we de-multiplex the reads, count the Tn5 insertions and normalize the counts

411 by harvesting times.

412 **Data availability.** The cell lines data of Buenrostro et al. 2015<sup>6</sup> is obtained from Gene Expression

413 Omnibus (GEO) accession GSE65360. The data of Satpathy et al. 2019<sup>4</sup> is obtained from GEO

414 accession GSE129785. The data of Lareau et al. 2019<sup>5</sup> is obtained from GEO accession GSE123581.

415 The data of Cusanovich et al. 2018<sup>8</sup> is obtained from Mouse Cell Atlas

416 (<http://atlas.gs.washington.edu/mouse-atac/>). The data of adult mouse cortex is obtained from

417 10X Genomics website

418 ([https://support.10xgenomics.com/single-cell-atac/datasets/1.2.0/atac\\_v1\\_adult\\_brain\\_fresh\\_5k](https://support.10xgenomics.com/single-cell-atac/datasets/1.2.0/atac_v1_adult_brain_fresh_5k)

419 ). Myoblasts data<sup>9</sup> is obtained from GEO accession GSE109828. EpiConv is available at Github

420 (<https://github.com/LiLin-biosoft/epiConv>).

421

## 422 **Acknowledgements**

423 This project was funded by the National Key Research and Development Program of China

424 (2018YFC1004602), National Natural Science Foundation of China (NSF 31871332) and a startup

425 fund to L.Z. from ShanghaiTech University. We would like to thank Xiaojing Zhao for testing the

426 reproducibility of the study. We would like to thank Yingdong Zhang on his technical support on

427 the HPC platform of ShanghaiTech University.

428

## 429 **Author contributions**

430 L.L. conceived the study, developed the methods and performed the analyses. L.L. and L.Z. wrote

431 the manuscript. L.Z supervised the study.

432 **Competing interests**

433 The authors declare no competing interests.

434

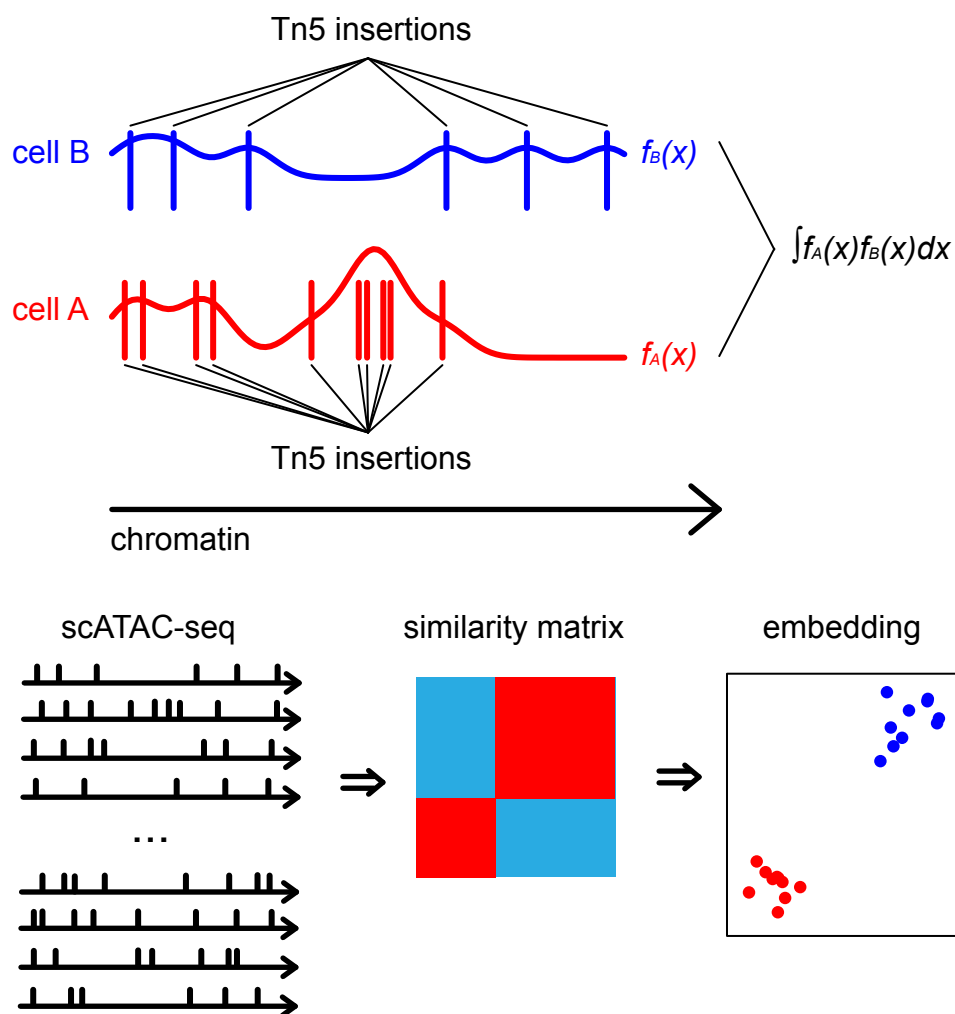

435 **Figure 1.** An overview of the epiConv algorithm.

436

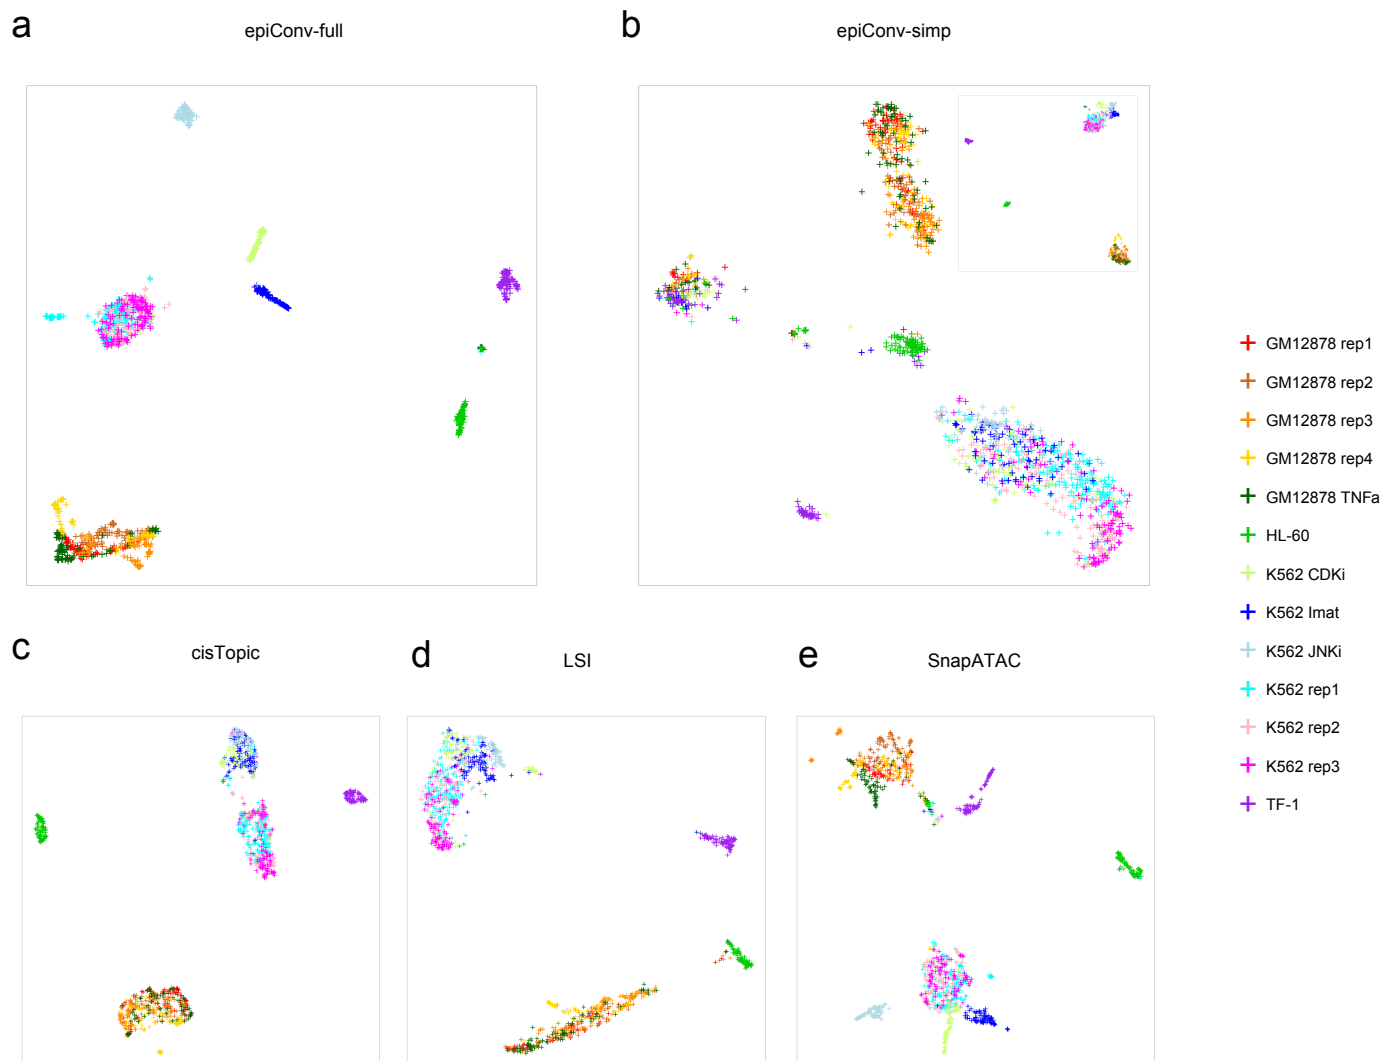



437 **Figure 2.** EpiConv performs better than other methods on cell lines data. **(a)** Embedding by  
438 epiConv-full. **(b)** Embedding by epiConv-simp. **(c)** Embedding by cisTopic. **(d)** Embedding by LSI **(e)**  
439 Embedding by snapATAC.  
440

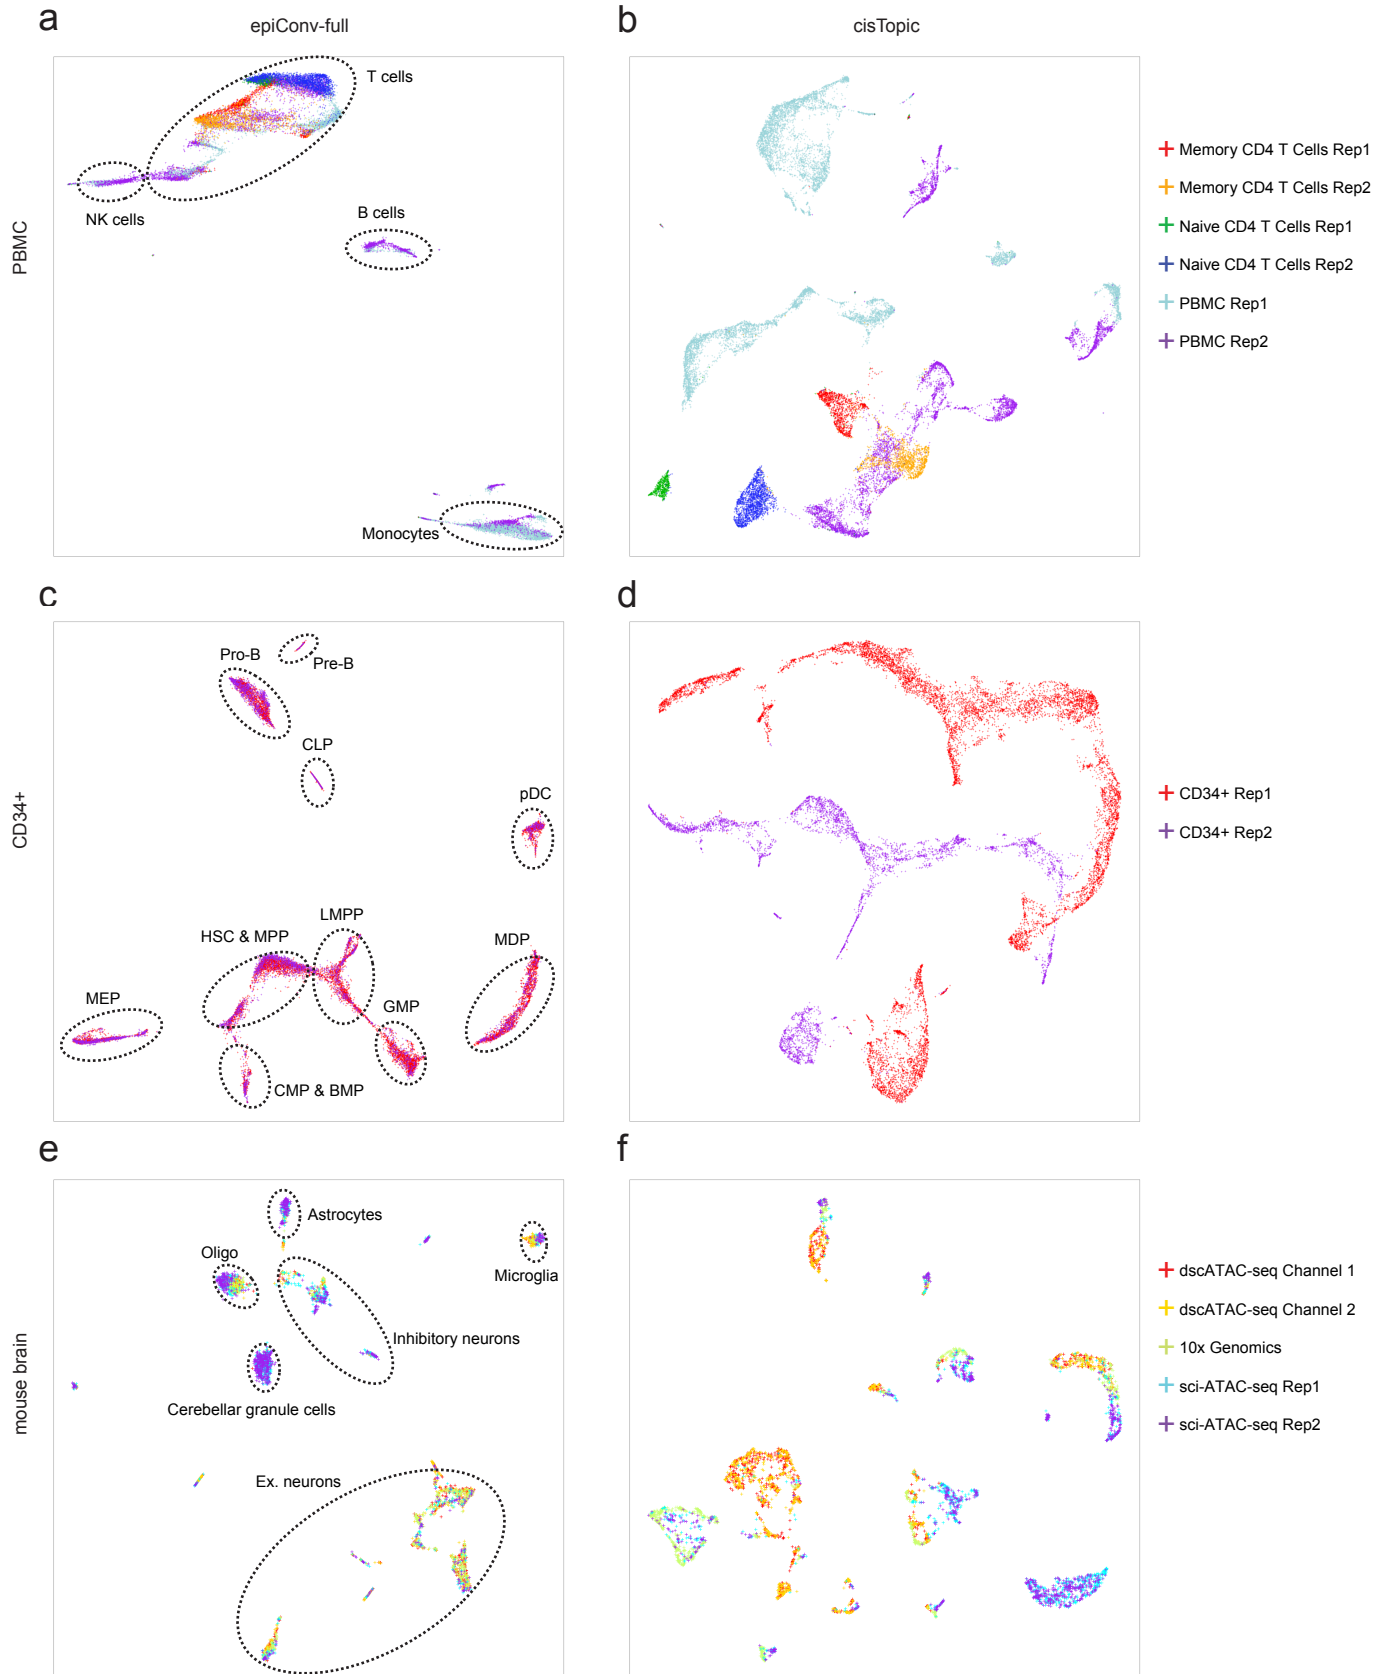

441 **Figure 3.** EpiConv removes batch effects. **(a,b)** Embeddings of PBMC dataset by epiConv-full and  
442 cisTopic. **(c,d)** Embeddings of CD34+ dataset by epiConv-full and cisTopic. **(e,f)** Embeddings of the  
443 integration of mouse brain data from dscATAC-seq, 10x Genomics and sci-ATAC-seq by  
444 epiConv-full and cisTopic. Major cell types in the embeddings of epiConv are circled. Embeddings  
445 by LSI and SnapATAC can be found in **Fig. S1**. HSC, hematopoietic stem cells; MPP, multipotent  
446 progenitors; LMPP, lymphoid-primed multipotent progenitors; CMP, common myeloid progenitors;  
447 BMP, basophil-mast cell progenitors; GMP, granulocyte-macrophage progenitors; MDP,  
448 monocyte-dendritic cell progenitors; pDC, plasmacytoid dendritic cells; MEP,  
449 megakaryocyte-erythroid progenitors; CLP, common lymphoid progenitors; Oligo,  
450 oligodendrocytes; Ex. neurons, excitatory neurons.  
451



452 **Figure 4.** EpiConv reveals the identities of unknown cells in Mouse Cell Atlas dataset. **(a)**  
453 Embedding by cisTopic. **(b)** Embedding by LSI. **(c)** Embedding by SnapATAC. **(d)** Embedding by  
454 epiConv-simp. In **(a-d)**, unknown cells and cells showing close relationships with them are colored  
455 according to the annotations from Cusanovich et al. 2018. Other irrelevant cells are colored in  
456 grey. Six major clusters in **(d)** that contain high proportion of unknown cells are circled. **(e)**  
457 Spearman correlations between aggregated samples with known and unknown identities from 6  
458 major clusters marked in **(d)**. Labels of unknown samples are colored in red. Numbers in the  
459 diagonal elements show the correlations between unknown samples and corresponding known  
460 samples. Endo I, endothelial I cells; Endo II, endothelial II cells; Ex. neurons, excitatory neurons;  
461 HSPC, hematopoietic progenitors; Oligo, oligodendrocytes.  
462

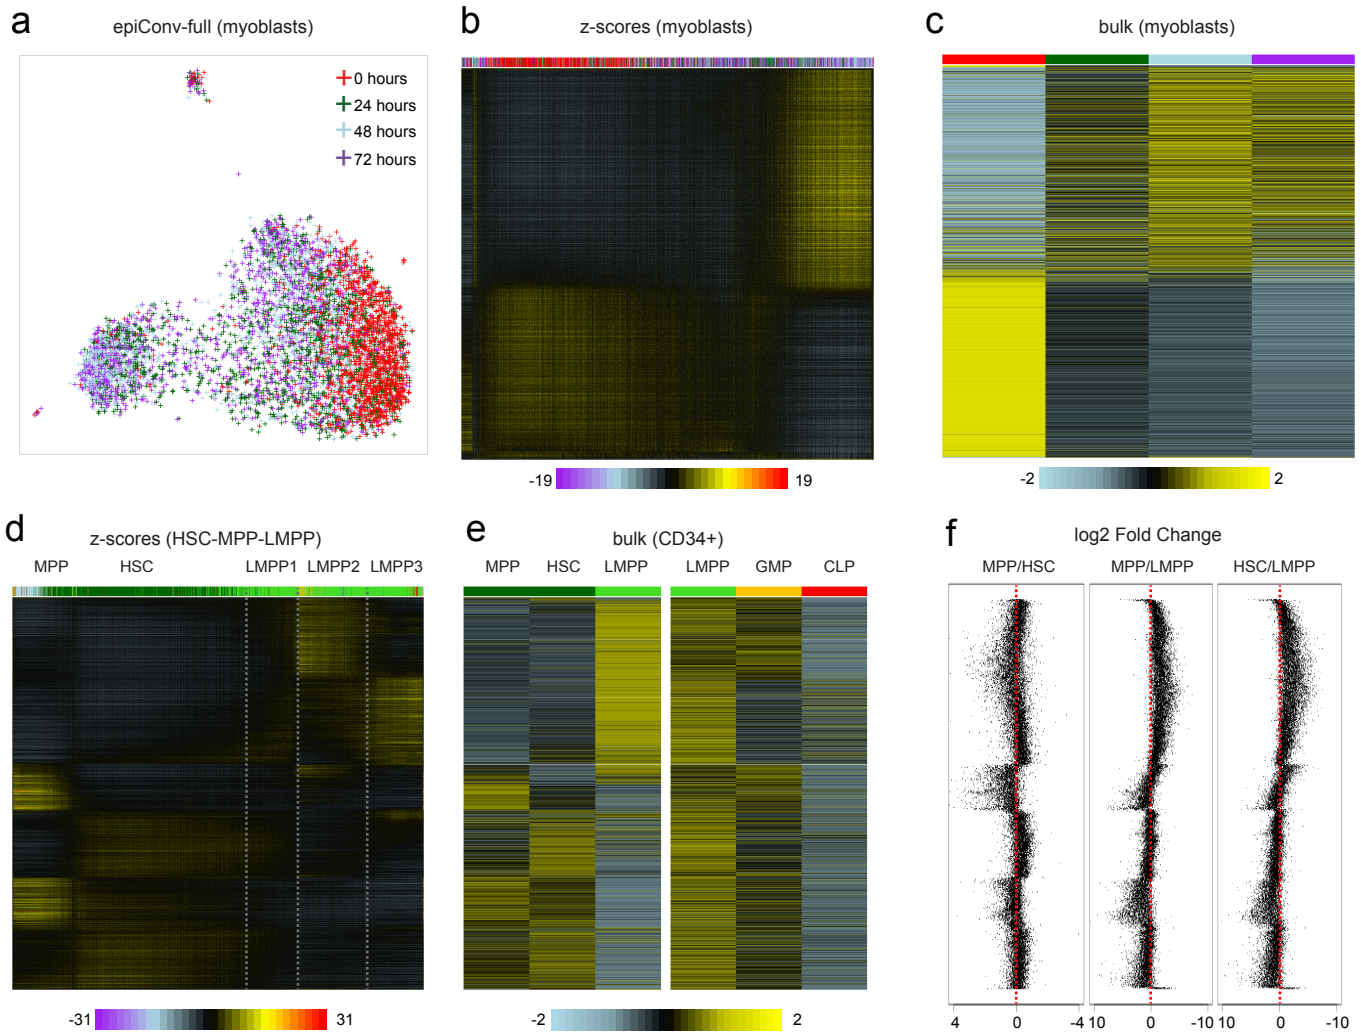

463 **Figure 5.** EpiConv detects differentially accessible peaks in cell mixtures. **(a)** Embedding of  
464 myoblast single cells by epiConv-full. **(b)** Accessibility z-scores of myoblast single cells inferred by  
465 epiConv. **(c)** Accessibility profiles of aggregated myoblast samples by harvesting times. Cells or  
466 aggregated samples in **(b,c)** are colored by harvesting times according to **(a)**. **(d)** Accessibility  
467 z-scores of HSC-MPP-LMPP single cells inferred by epiConv. **(e)** Accessibility profiles of HSC, MPP  
468 and LMPP bulk samples and LMPP, GMP and CLP bulk samples. **(f)** Log2 Fold Change of peaks  
469 between HSC, MPP and LMPP bulk samples. Points represent the corresponding peaks in **(d,e)**  
470

## 471 Reference:

- 472 1. Buenrostro, J.D., Giresi, P.G., Zaba, L.C., Chang, H.Y. & Greenleaf, W.J. Transposition of native  
473 chromatin for fast and sensitive epigenomic profiling of open chromatin, DNA-binding  
474 proteins and nucleosome position. *Nat Methods* **10**, 1213-1218 (2013).
- 475 2. Klemm, S.L., Shipony, Z. & Greenleaf, W.J. Chromatin accessibility and the regulatory  
476 epigenome. *Nat Rev Genet* **20**, 207-220 (2019).
- 477 3. Cusanovich, D.A. et al. Multiplex single cell profiling of chromatin accessibility by  
478 combinatorial cellular indexing. *Science* **348**, 910-914 (2015).
- 479 4. Satpathy, A.T. et al. Massively parallel single-cell chromatin landscapes of human immune cell  
480 development and intratumoral T cell exhaustion. *Nat Biotechnol* **37**, 925-936 (2019).
- 481 5. Lareau, C.A. et al. Droplet-based combinatorial indexing for massive-scale single-cell  
482 chromatin accessibility. *Nat Biotechnol* **37**, 916-924 (2019).
- 483 6. Buenrostro, J.D. et al. Single-cell chromatin accessibility reveals principles of regulatory  
484 variation. *Nature* **523**, 486-490 (2015).
- 485 7. Chen, H. et al. Assessment of computational methods for the analysis of single-cell ATAC-seq  
486 data. *Genome Biol* **20**, 241 (2019).
- 487 8. Cusanovich, D.A. et al. A Single-Cell Atlas of In Vivo Mammalian Chromatin Accessibility. *Cell*  
488 **174**, 1309-1324 e1318 (2018).
- 489 9. Pliner, H.A. et al. Cicero Predicts cis-Regulatory DNA Interactions from Single-Cell Chromatin  
490 Accessibility Data. *Mol Cell* **71**, 858-871 e858 (2018).
- 491 10. Schep, A.N., Wu, B., Buenrostro, J.D. & Greenleaf, W.J. chromVAR: inferring  
492 transcription-factor-associated accessibility from single-cell epigenomic data. *Nat Methods*  
493 **14**, 975-978 (2017).
- 494 11. Bravo Gonzalez-Blas, C. et al. cisTopic: cis-regulatory topic modeling on single-cell ATAC-seq  
495 data. *Nat Methods* **16**, 397-400 (2019).
- 496 12. Corces, M.R. et al. Lineage-specific and single-cell chromatin accessibility charts human  
497 hematopoiesis and leukemia evolution. *Nat Genet* **48**, 1193-1203 (2016).
- 498 13. Zhang, Y. et al. Model-based analysis of ChIP-Seq (MACS). *Genome Biol* **9**, R137 (2008).
- 499 14. Langmead, B. & Salzberg, S.L. Fast gapped-read alignment with Bowtie 2. *Nat Methods* **9**,  
500 357-359 (2012).
- 501 15. Kent, W.J. et al. The human genome browser at UCSC. *Genome Res* **12**, 996-1006 (2002).
- 502 16. McInnes, L., Healy, J., Saul, N. & Großberger, L. UMAP: Uniform Manifold Approximation and  
503 Projection. *Journal of Open Source Software* **3** (2018).

504



505 **Supplementary materials**

506

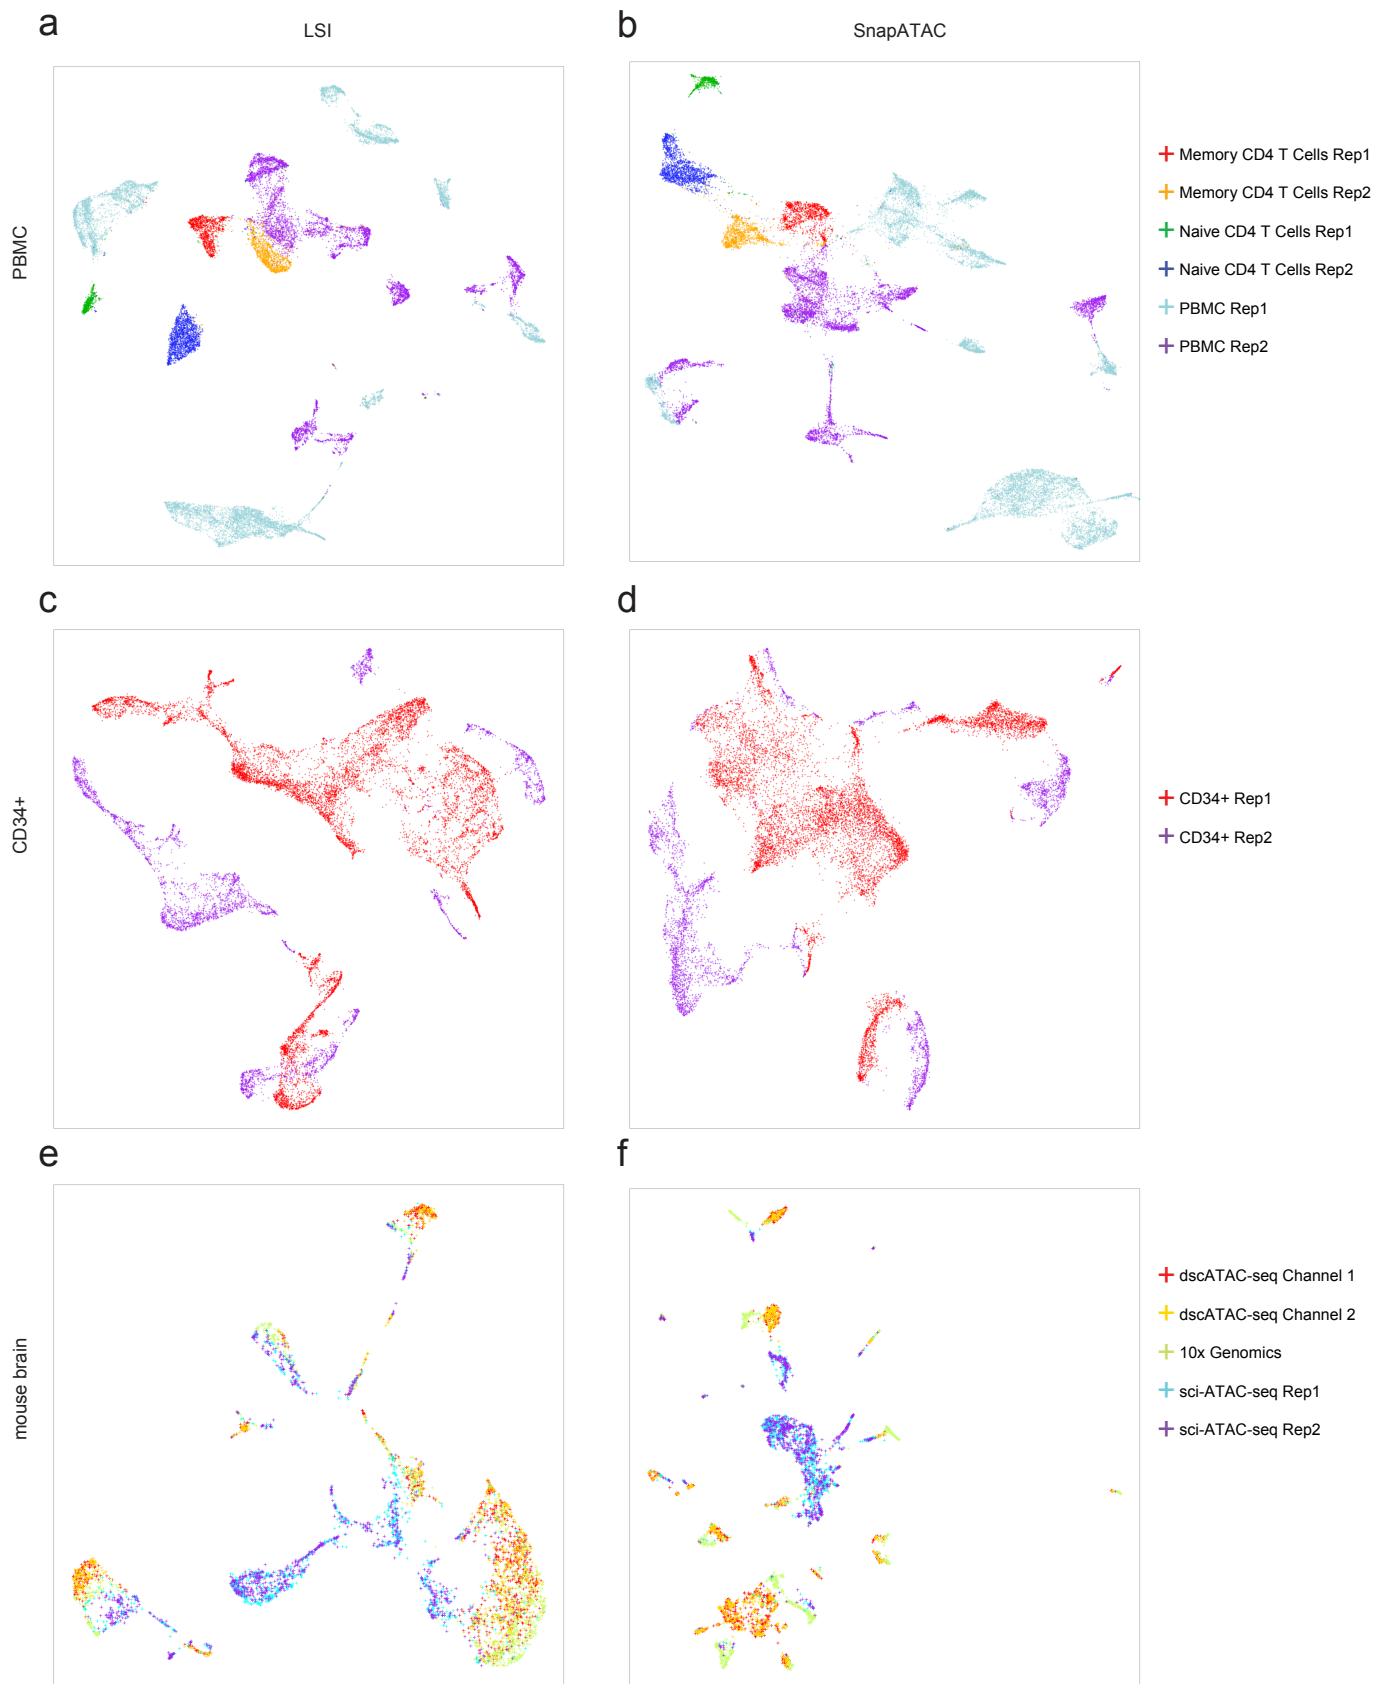

507 **Figure S1.** Embeddings of PBMC (**a,b**), CD34+ (**c,d**) and mouse brain (**e,f**) datasets by LSI and  
508 SnapATAC .  
509

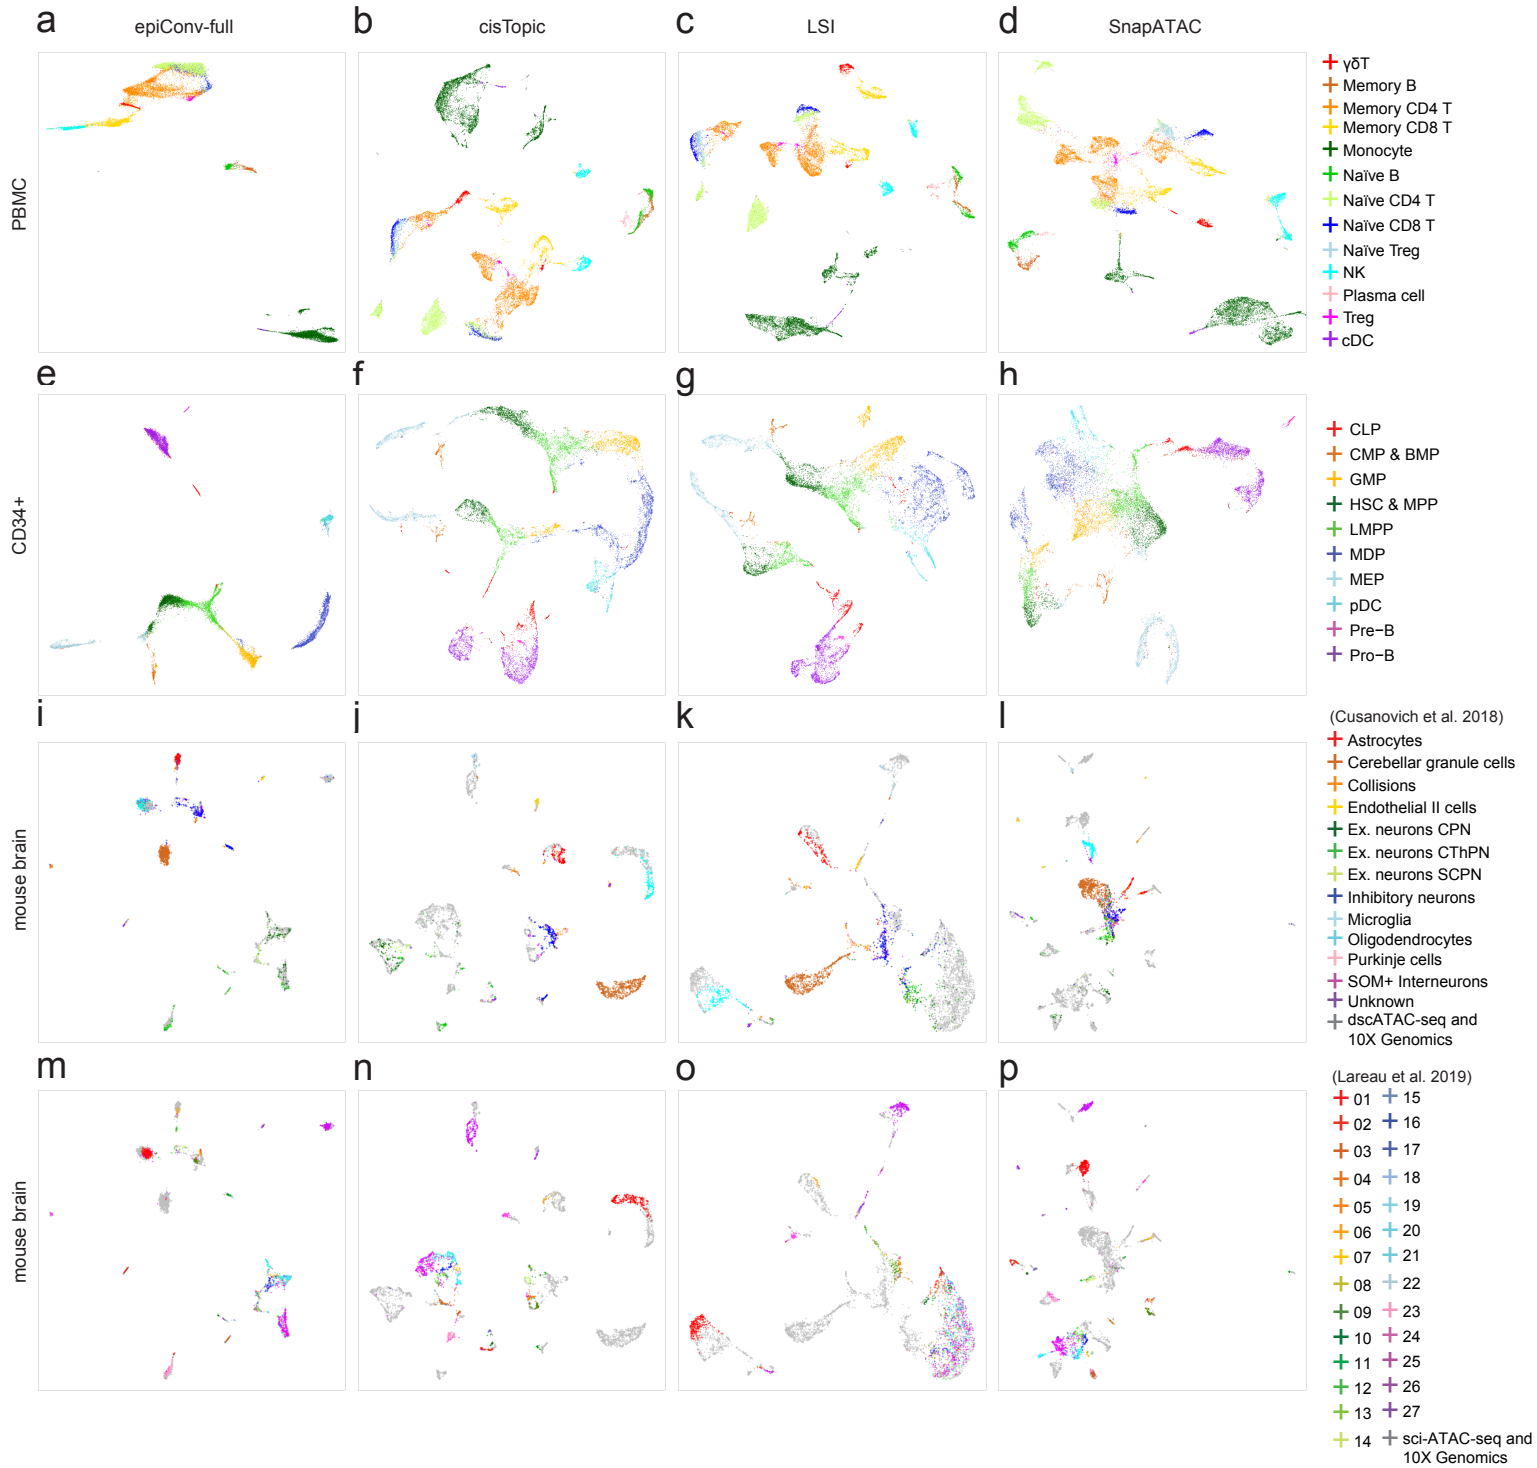

510 **Figure S2.** Comparison of embeddings by epiConv-full, cisTopic, LSI and SnapATAC with cell  
511 annotations from original articles. **(a-d)** Embeddings of PBMC dataset by epiConv-full, cisTopic,  
512 LSI and SnapATAC, colored by annotations from Satpathy et al. 2019. **(e-h)** Embeddings of CD34+  
513 dataset by epiConv-full, cisTopic, LSI and SnapATAC, colored by annotations from Satpathy et al.  
514 2019. **(i-p)** Embeddings of mouse brain dataset by epiConv-full, cisTopic, LSI and SnapATAC,  
515 colored by annotations from Cusanovich et al. 2018 **(i-l)** and Lareau et al. 2019 **(m-p)**.  
516

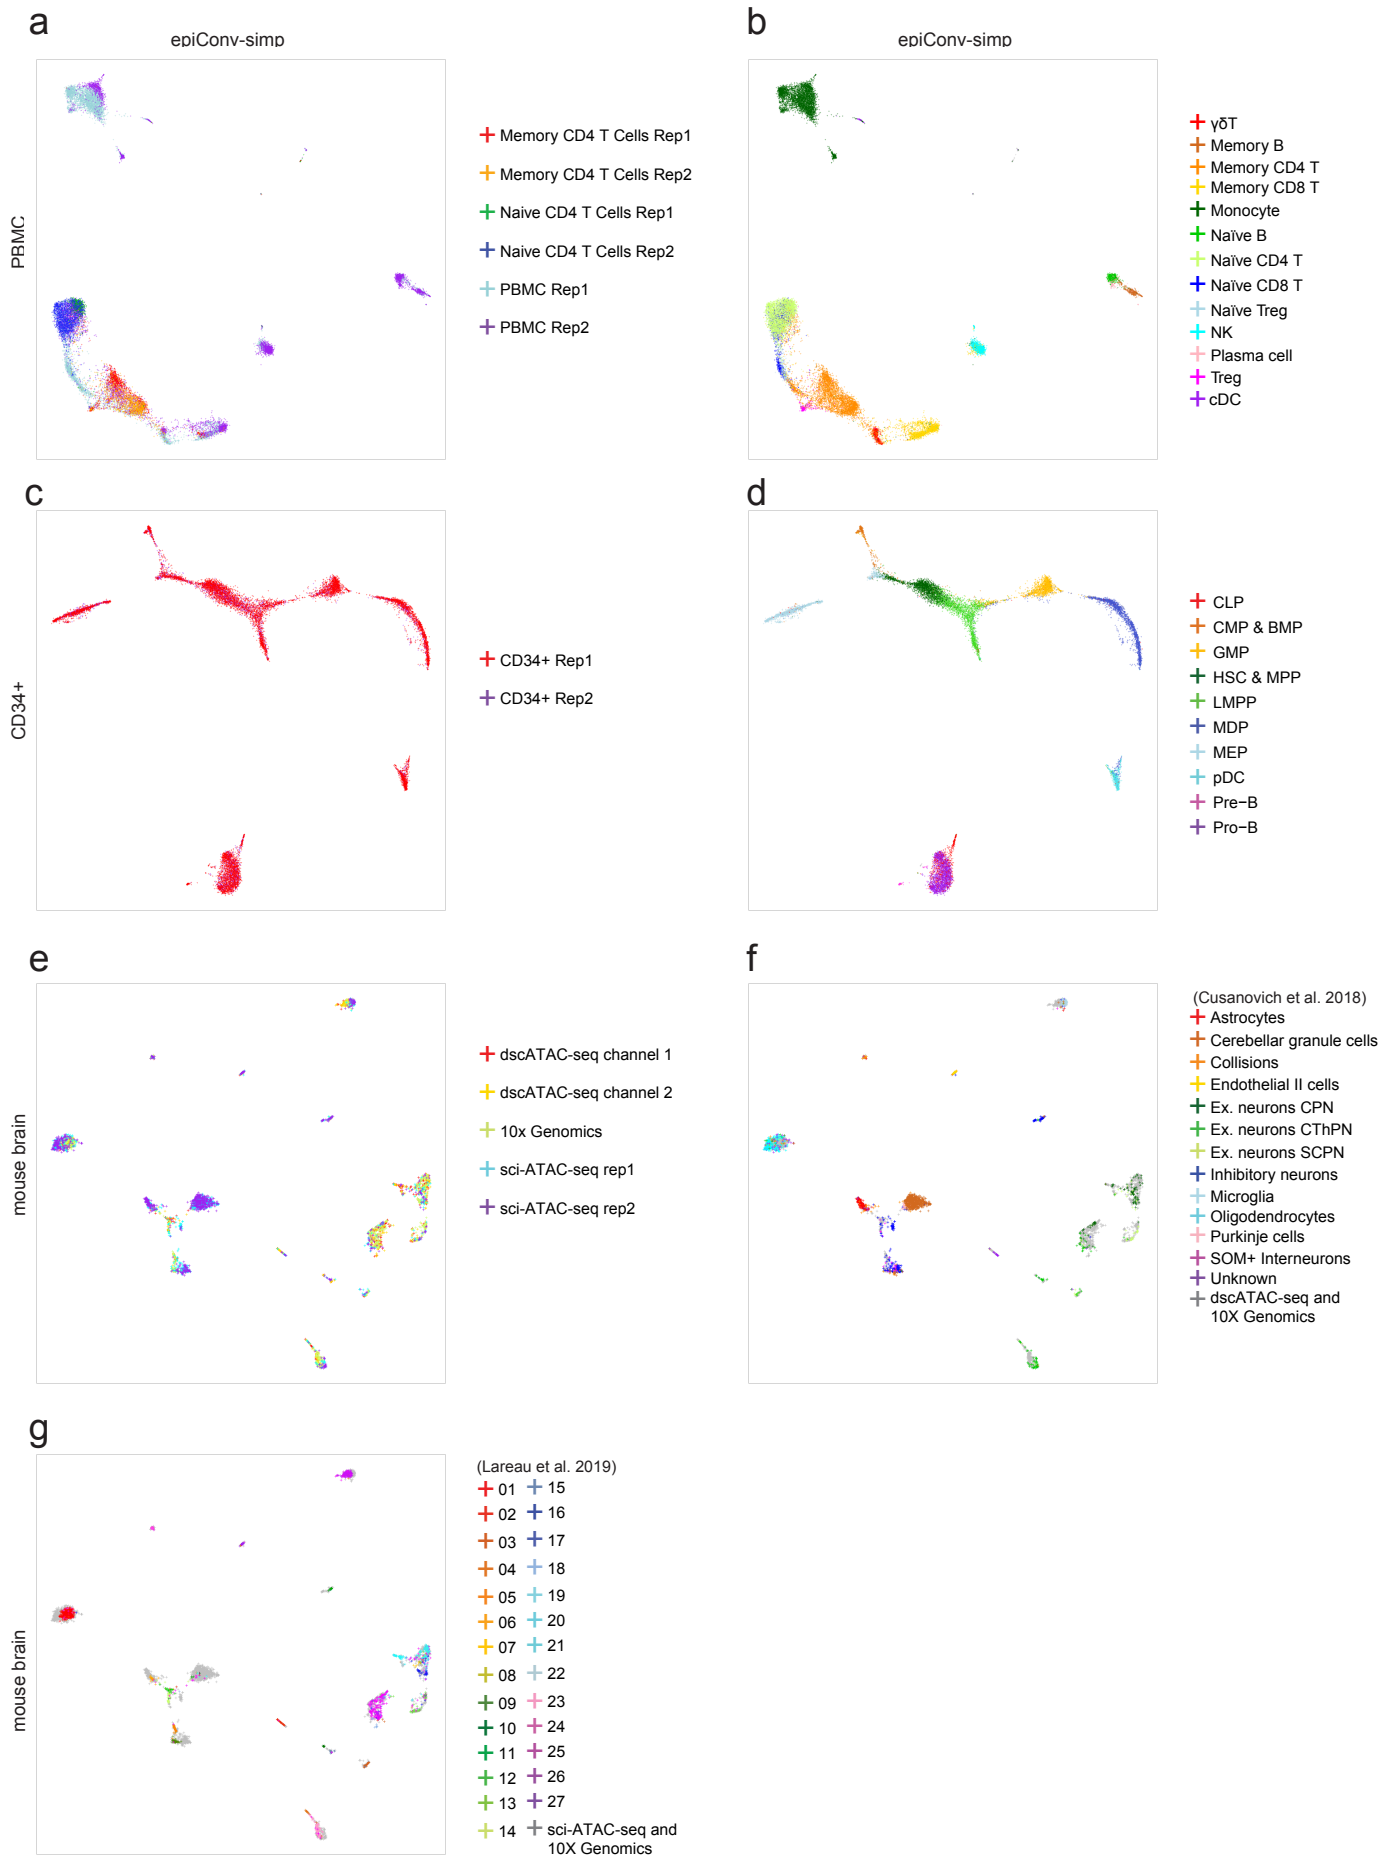

517 **Figure S3.** Embeddings of PBMC, CD34+ and mouse brain datasets by epiConv-simp. **(a,b)**  
518 Embeddings of PBMC dataset by epiConv-simp, colored by batch **(a)** and annotations from  
519 Satpathy et al. 2019 **(b)**. **(c,d)** Embeddings of CD34+ dataset by epiConv-simp, colored by batch **(c)**  
520 and annotations from Satpathy et al. 2019 **(d)**. **(e-g)** Embeddings of mouse brain dataset by  
521 epiConv-simp, colored by batch **(e)**, annotations from Cusanovich et al. 2018 **(f)** and annotations  
522 from Lareau et al. 2019 **(g)**.  
523

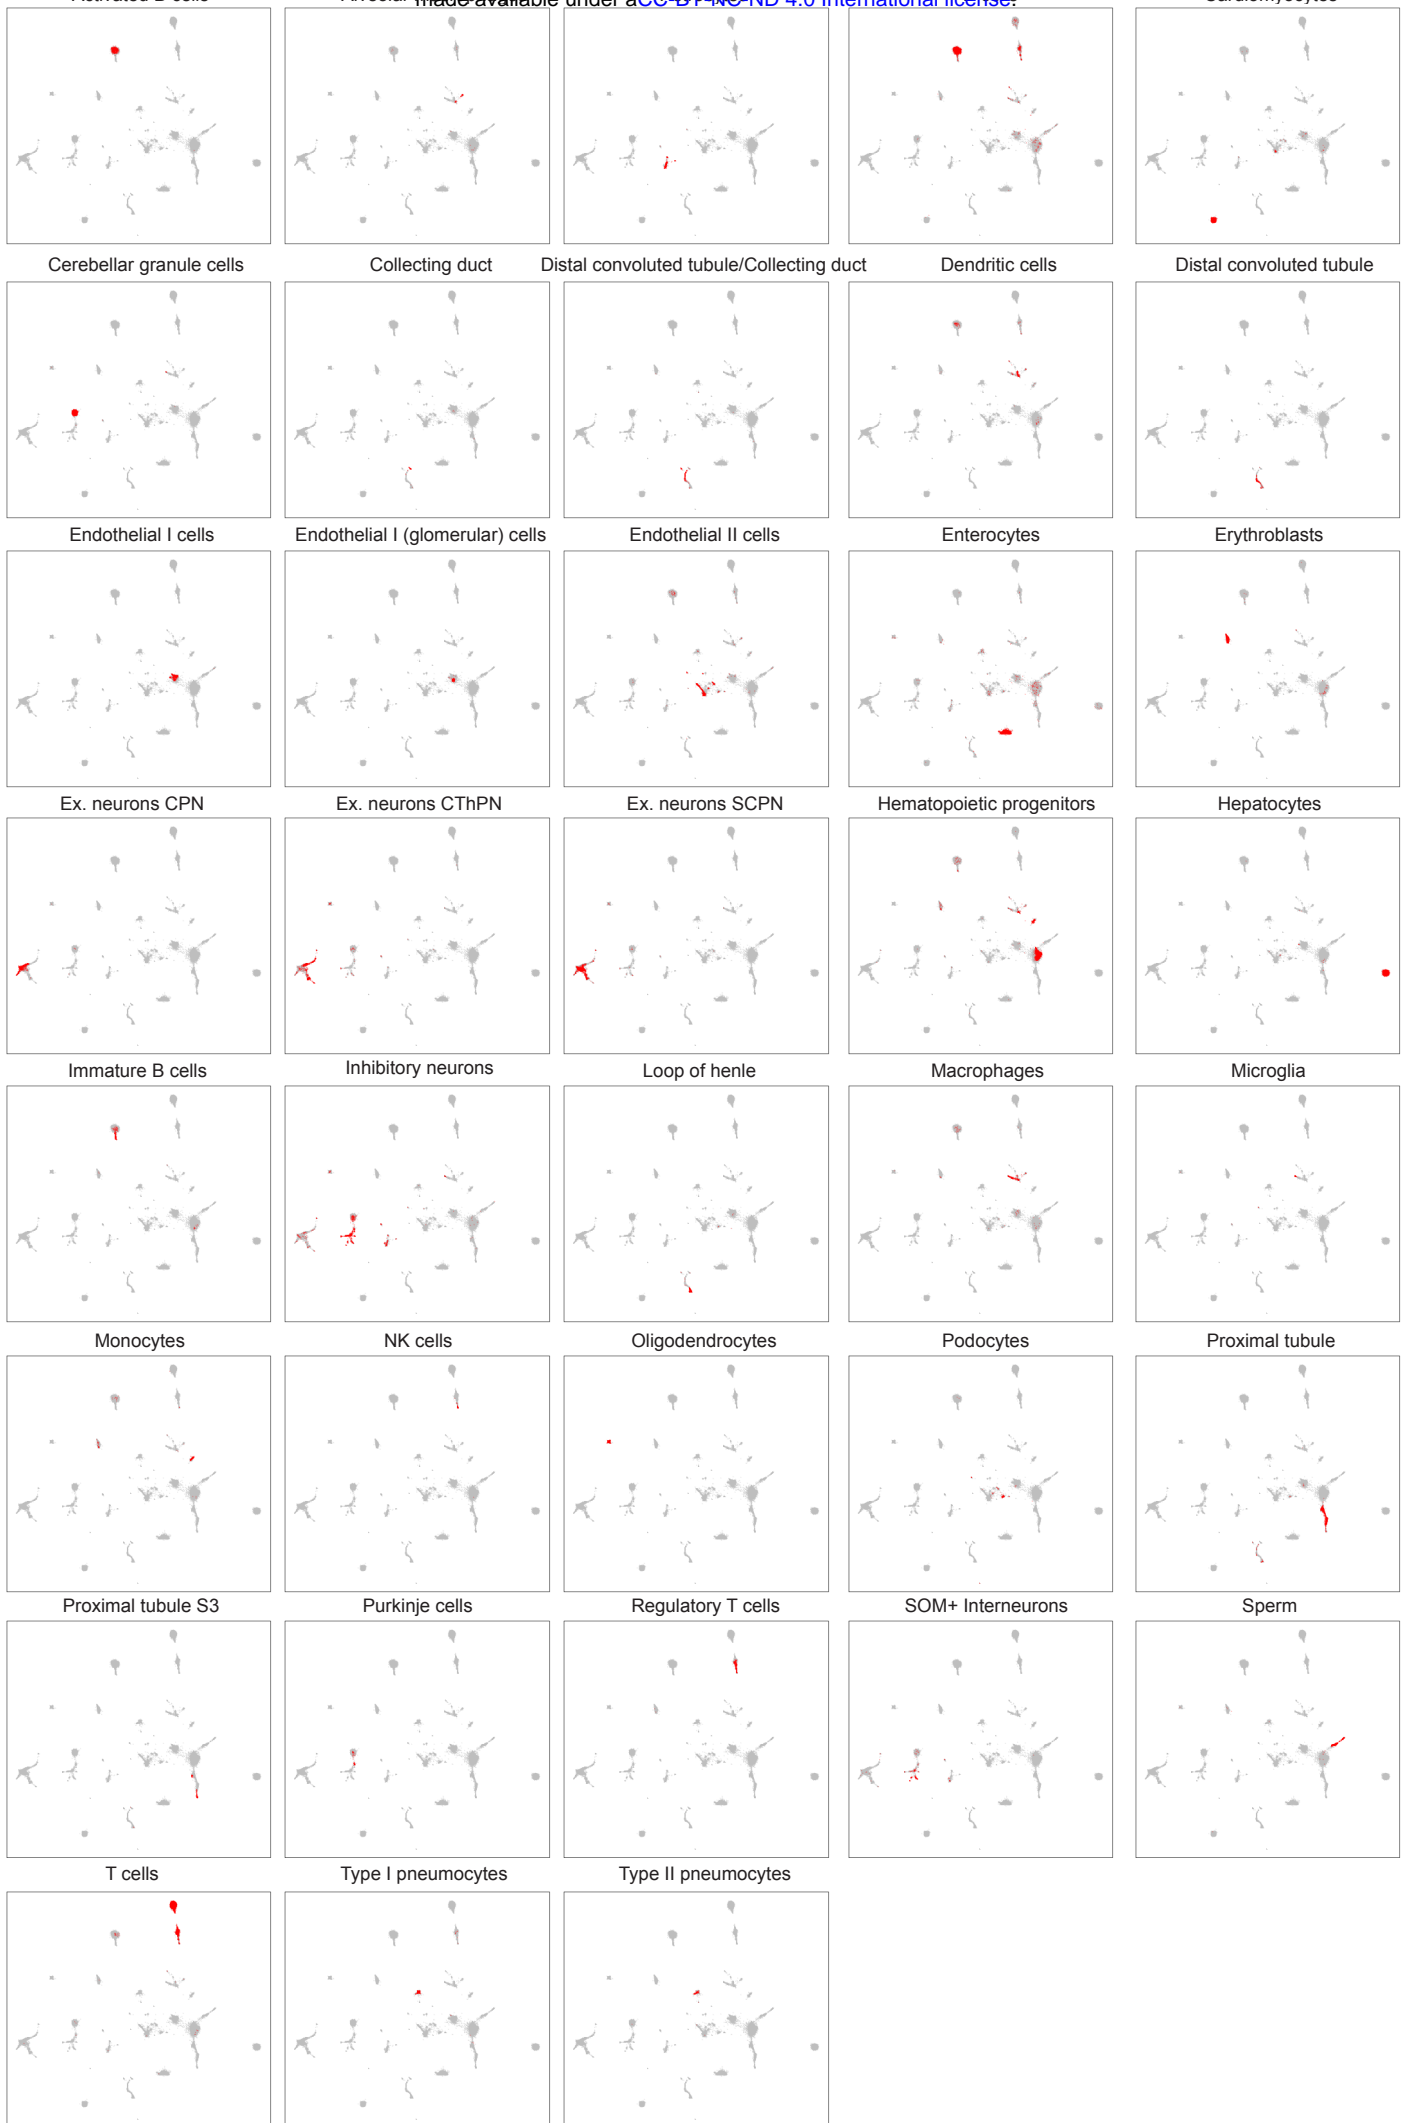



524 **Figure S4.** Embeddings of Mouse Cell Atlas dataset by epiConv-simp. The corresponding cell types

525 are colored in red and other cells are colored in grey.

526

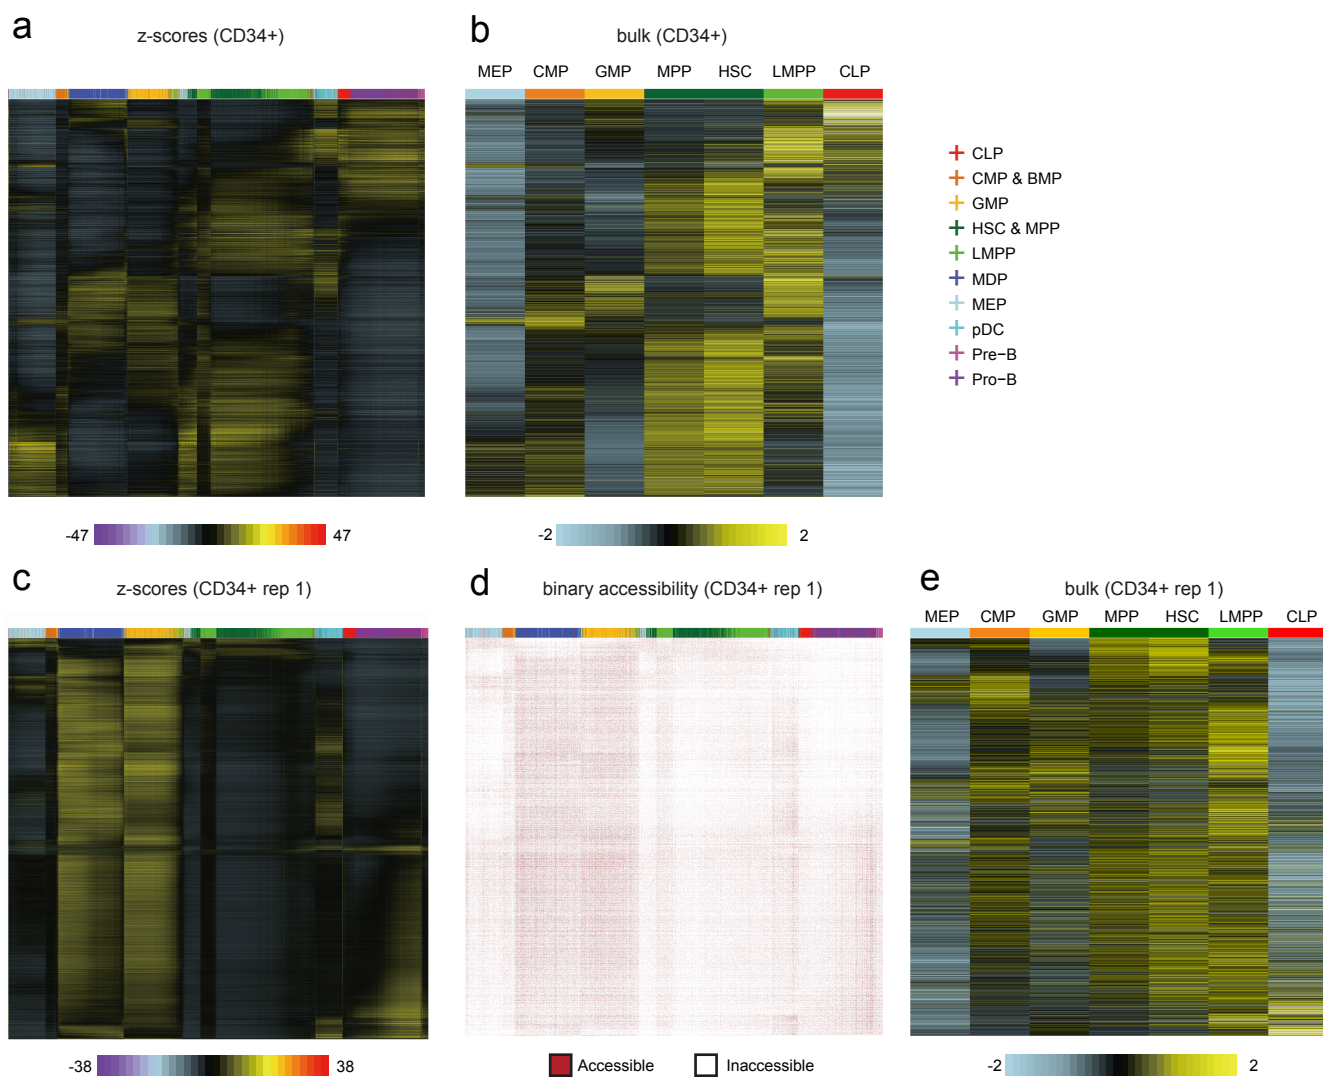

527 **Figure S5.** Accessibility z-scores of CD34+ dataset. **(a)** Accessibility z-scores of CD34+ single cells  
528 **(b)** Accessibility profiles of bulk CD34+ samples. **(c)** Accessibility z-scores of CD34+ single cells in  
529 replicate 1. **(d)** Binary accessibility profiles of CD34+ single cells in replicate 1. **(e)** Accessibility  
530 profiles of bulk CD34+ samples. DE peaks in **(a,b)** are selected from whole CD34+ dataset by  
531 setting the scaling factors of cells to their library sizes and DE peaks in **(c-e)** are selected from  
532 replicate 1 in CD34+ dataset by setting the scaling factors of cells to 1.  
533

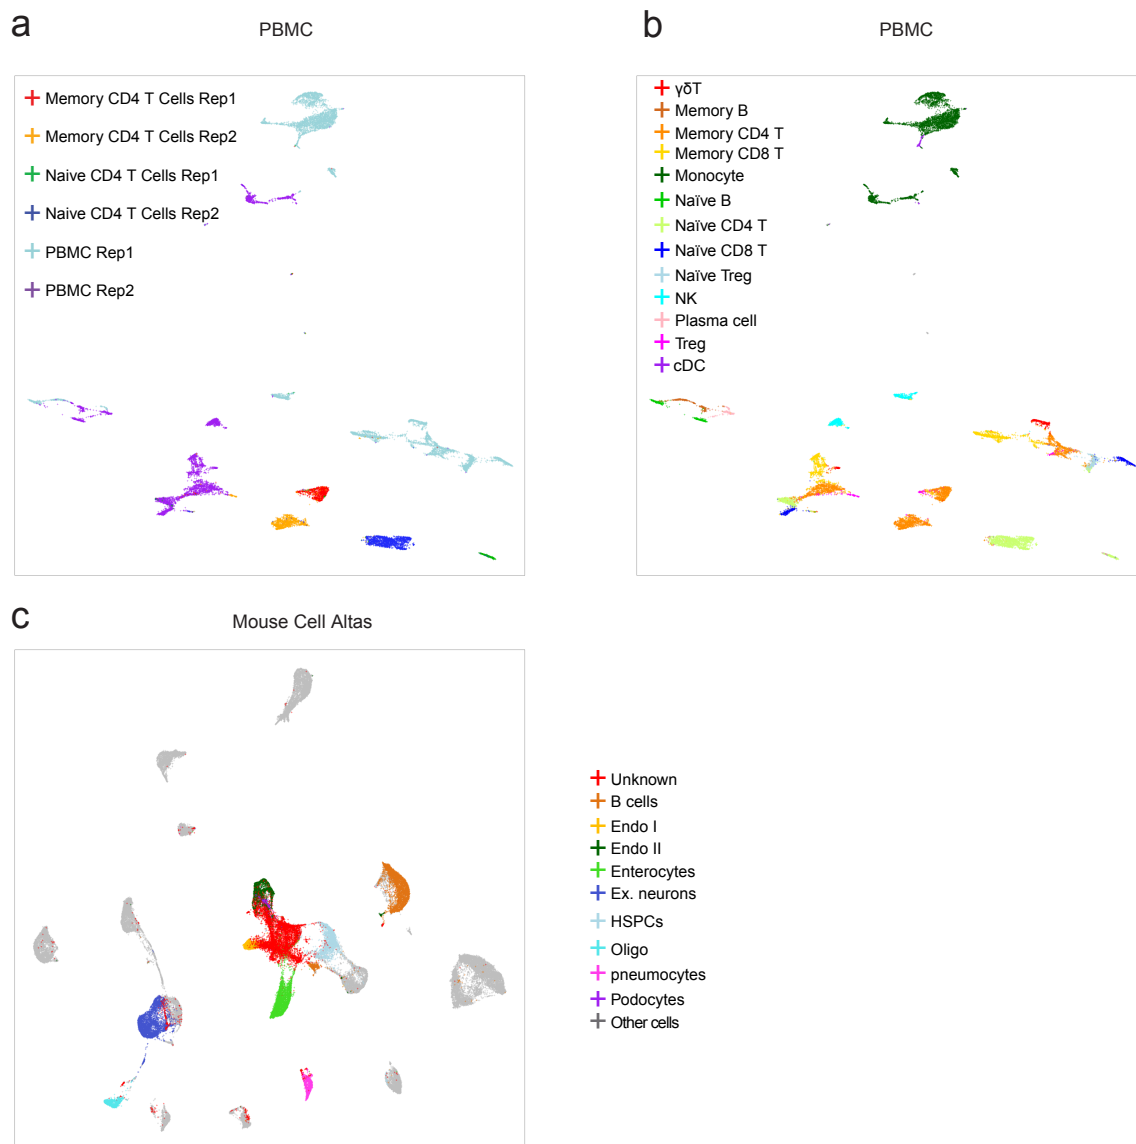

534 **Figure S6.** Embeddings of PBMC and Mouse Cell Atlas dataset by inferring latent features from  
535 the similarity matrix of epiConv. **(a)** Embedding of PBMC dataset, colored by batch. **(b)**  
536 Embedding of PBMC dataset, colored by annotations from Satpathy et al. 2019. **(c)** Embedding of  
537 Mouse Cell Atlas dataset, colored by annotations from Cusanovich et al. 2018.  
538

539 **Supplementary Note 1**

540 Here, we describe an alternative denoising method that keeps the unit of similarity matrix  
541 unchanged. Given N cells and their similarity matrix S where  $s_{ij}$  is the similarity between cell  $i$  and  
542  $j$ , we first transform S to a weight matrix W as follows:

$$w_{ij} = \begin{cases} 10^{s_{ij}} \cdot \log_{10}(lib_i), & i \in j's \text{ neighbors} \\ 0, & i \notin j's \text{ neighbors} \end{cases}$$

543 Where  $j$ 's neighbors are the top 20 cells with highest similarities to  $j$ . For each column  $j$ , we scale  
544 the sum of column (excluding the diagonal elements) to a fraction parameter  $\theta$  between 0 and 1  
545 and the diagonal elements of W are set to  $1 - \theta$ . Then the sum of each column is equal to 1. The  
546 matrix W defines how to mix the information from the cell itself and its neighbors, where  $\theta$   
547 proportion of information comes from its neighbors and the weight of each neighbor is  
548 determined by its similarity to cell  $j$  multiplied by its log10 library size, and  $1 - \theta$  proportion of  
549 information comes from cell  $j$  itself. In this study, we set  $\theta$  to 0.25. We create a similarity matrix  $S'$   
550 where its elements are equal to S except for the diagonal elements (the similarity of each cell to  
551 itself, which is not defined for S). The diagonal element  $s'_{jj}$  is set to the 99th percentile of column  
552  $j$ , which can be used to approximate the similarity of cell  $j$  to itself. The denoised similarity matrix  
553  $S_{denoise}$  is calculated by matrix product of  $S'$  and W as follows:

$$S_{denoise} = \frac{S' \cdot W + (S' \cdot W)^T}{2}$$

554 Given  $S' \cdot W$  is not a symmetrical matrix, we average  $S' \cdot W$  and  $(S' \cdot W)^T$  to obtain the  
555 denoised matrix. As a proof of the reliability of our algorithm, the upper triangle and lower  
556 triangle of  $S' \cdot W$  are always close to each other. The distance matrix D is calculated by  
557  $D = -S_{denoise}$ . Compared to the denoising method described in Methods, the alternative  
558 method denoises the data and largely keeps the information of original matrix (including  
559 variations from both batch effects and biological heterogeneity).
